# Supplementary material for: Capturing Unanticipated Drug Toxicities Using an Ensemble Machine Learning Approach
Source: Research Square preprint supplement (doi:10.21203/rs.3.rs-6999821/v1), 2025-07-10
Supplement: Supplementary file 1 [file 861b838b3b19680c84379f98.docx]

**Supplementary Figure 1**

**Supplementary Figure 1. Countries of drug withdrawal used for analysis and labeling in the predictor.** A large proportion of drugs in this study have been withdrawn by the USFDA. A single drug can be withdrawn from multiple countries.

**Supplementary Figure 2**

**Supplementary Figure 2. Reasons for Drug withdrawals.** A. Cardiovascular toxicity withdrawal reasons primarily center around arrhythmias. B. Hepatotoxicity withdrawal reasons are largely unannotated more specifically. C. Neuropsychiatric toxicity withdrawal reasons are vast and fall into a large number of categories.

**Supplementary Figure 3**

**Supplementary Figure 3. Indications of drugs in clinical trials based on ATC category.** The largest group of drugs under investigation are indicated for alimentary and metabolism while the fewest are antiparasitic.

**Supplementary Table 1. Ranking of all drug chemical features in the model.** Feature names are taken from the ChEMBL database as accessed with the chembl_webresource_client.

| Drug Chemical Features | Rank |
| --- | --- |
| oral administration | 1 |
| parenteral | 1 |
| topical | 1 |
| prodrug | 8 |
| cx_most_apka | 10 |
| qed_weighted | 11 |
| base | 16 |
| hba | 16 |
| full_mwt | 16 |
| psa | 16 |
| hba_lipinski | 18 |
| alogp | 18 |
| cx_logd | 18 |
| cx_logp | 18 |
| heavy atoms | 18 |
| mw_freebase | 18 |
| mw_monoisotopic | 18 |
| cx_most_bpka | 19 |
| rtb | 19 |
| aromatic rings | 19 |
| hbd_lipinski | 20 |
| chirality | 22 |
| hbd | 22 |
| num_ro5_violations | 25 |
| num_lipinski_ro5_violations | 26 |
| neutral | 26 |
| zwitterion | 28 |
| acid | 28 |
| ro3_pass | 30 |

**Supplementary Table 2. Ranking of all proteins in the model.**

| Drug Targets | Rank |
| --- | --- |
| O15438 | 1 |
| O95342 | 1 |
| O15439 | 1 |
| P08684 | 2 |
| Q92887 | 2 |
| O15245 | 6 |
| Q96FL8 | 8 |
| P33261 | 8 |
| Q01959 | 9 |
| P51589 | 10 |
| P08183 | 11 |
| Q9H492 | 44 |
| Q9GZQ8 | 48 |
| P46059 | 83 |
| Q86VL8 | 84 |
| Q13547 | 84 |
| P61604 | 91 |
| P42330 | 96 |
| Q9UM07 | 97 |
| P11712 | 104 |
| P56524 | 106 |
| Q92769 | 106 |
| Q9BY41 | 107 |
| Q99250 | 109 |
| Q9NY46 | 109 |
| P08238 | 111 |
| Q9UQL6 | 112 |
| Q9UKV0 | 114 |
| P35498 | 114 |
| Q8WUI4 | 116 |
| Q16762 | 123 |
| O15379 | 127 |
| P37231 | 131 |
| P10635 | 133 |
| Q96DB2 | 134 |
| Q14330 | 136 |
| P00533 | 140 |
| P00403 | 140 |
| P05177 | 140 |
| Q4U2R8 | 140 |
| Q00975 | 141 |
| Q6SZW1 | 145 |
| P10809 | 153 |
| Q9UBN7 | 160 |
| P23219 | 166 |
| Q969S8 | 166 |
| P14416 | 166 |
| P27338 | 168 |
| P32239 | 176 |
| P00519 | 176 |
| P04035 | 177 |
| Q92523 | 178 |
| P24557 | 179 |
| Q08499 | 181 |
| P35968 | 182 |
| P10275 | 185 |
| Q9P0X4 | 186 |
| P08172 | 187 |
| Q05940 | 187 |
| Q14973 | 189 |
| P50416 | 192 |
| Q06278 | 196 |
| Q9Y2T6 | 196 |
| P09619 | 197 |
| P61088 | 199 |
| P12931 | 201 |
| Q07869 | 202 |
| Q9C000 | 208 |
| P50052 | 208 |
| Q9Y263 | 209 |
| P18031 | 210 |
| Q96LA8 | 210 |
| P25101 | 212 |
| Q13639 | 215 |
| Q9UNQ0 | 217 |
| Q01118 | 218 |
| Q01650 | 218 |
| Q08050 | 220 |
| P28223 | 223 |
| Q13370 | 224 |
| P35367 | 225 |
| Q9Y5Y9 | 226 |
| Q9UQD0 | 228 |
| O95069 | 233 |
| P35354 | 233 |
| P31645 | 234 |
| O60840 | 235 |
| P41143 | 235 |
| P04150 | 236 |
| P35368 | 237 |
| Q14432 | 237 |
| Q13936 | 238 |
| Q13698 | 238 |
| Q01668 | 238 |
| Q05513 | 238 |
| Q9UDY8 | 238 |
| Q03181 | 241 |
| P06401 | 241 |
| P08588 | 242 |
| O15244 | 243 |
| P35372 | 243 |
| Q9Y271 | 243 |
| Q8N5K1 | 245 |
| Q15858 | 248 |
| Q14524 | 252 |
| Q9UI33 | 252 |
| P15121 | 253 |
| P06241 | 254 |
| Q02156 | 256 |
| P24530 | 258 |
| P32238 | 259 |
| P34972 | 260 |
| P35499 | 261 |
| P08912 | 265 |
| P21452 | 267 |
| P21397 | 268 |
| P06276 | 269 |
| P52895 | 269 |
| P21917 | 273 |
| P07949 | 274 |
| Q92731 | 275 |
| P03372 | 276 |
| P22303 | 276 |
| Q05655 | 276 |
| P00918 | 277 |
| Q9UQM7 | 282 |
| P41595 | 282 |
| P18825 | 283 |
| Q04828 | 284 |
| Q12797 | 286 |
| P34913 | 287 |
| Q96D31 | 289 |
| Q13304 | 297 |
| Q15139 | 298 |
| P16234 | 298 |
| P41145 | 301 |
| P23786 | 302 |
| P21554 | 305 |
| P28335 | 305 |
| P23975 | 306 |
| P78527 | 307 |
| Q02880 | 307 |
| P08235 | 308 |
| Q99720 | 308 |
| P50406 | 308 |
| Q04759 | 310 |
| P10632 | 314 |
| Q9NZ45 | 315 |
| P25100 | 315 |
| P51681 | 316 |
| P11229 | 316 |
| P35462 | 317 |
| P35348 | 321 |
| P07900 | 321 |
| Q13557 | 322 |
| P00374 | 322 |
| P51684 | 325 |
| Q9NPD5 | 325 |
| P37840 | 325 |
| Q9GZV3 | 326 |
| P21728 | 330 |
| Q12809 | 331 |
| P30556 | 331 |
| P11387 | 335 |
| O75751 | 335 |
| P07550 | 336 |
| P11388 | 336 |
| P25021 | 341 |
| Q13554 | 342 |
| P18089 | 344 |
| P04626 | 347 |
| Q16539 | 349 |
| P0DMS8 | 351 |
| P08913 | 352 |
| Q16790 | 354 |
| O60674 | 355 |
| P49327 | 355 |
| O60885 | 355 |
| P08173 | 358 |
| P00395 | 358 |
| P20309 | 359 |
| Q13555 | 360 |
| Q07343 | 361 |
| P09917 | 362 |
| P33032 | 362 |
| P36888 | 363 |
| P28472 | 363 |
| Q08493 | 364 |
| P07333 | 366 |
| P11473 | 368 |
| P10721 | 368 |
| Q96S37 | 368 |
| P48736 | 369 |
| P05164 | 369 |
| P42345 | 371 |
| P05067 | 373 |
| P17948 | 373 |
| Q16850 | 373 |
| P14902 | 378 |
| P28482 | 378 |
| P06213 | 378 |
| P06239 | 379 |
| Q9NPC2 | 379 |
| P06493 | 381 |
| P54760 | 382 |
| P19793 | 384 |
| P08069 | 384 |
| P08908 | 387 |
| P55072 | 389 |
| P00915 | 389 |
| O60218 | 391 |
| P41743 | 393 |
| P11362 | 398 |
| P13945 | 401 |
| Q460N3 | 408 |
| Q9Y5S8 | 409 |
| P49354 | 410 |
| P14867 | 412 |
| O43497 | 412 |
| P07948 | 413 |
| P49356 | 413 |
| P08254 | 414 |
| Q02763 | 414 |
| P32245 | 415 |
| P14550 | 417 |
| Q05586 | 417 |
| Q14376 | 419 |
| Q9Y572 | 419 |
| O95180 | 419 |
| P47989 | 420 |
| Q15303 | 420 |
| Q96GD4 | 422 |
| P42336 | 423 |
| P09923 | 423 |
| P37288 | 425 |
| P20813 | 431 |
| P29274 | 438 |
| P11309 | 439 |
| P14780 | 442 |
| P43681 | 442 |
| P48729 | 445 |
| Q8TCC7 | 445 |
| Q9ULX7 | 445 |
| P22309 | 448 |
| P05771 | 452 |
| P43119 | 452 |
| P49721 | 453 |
| P05186 | 455 |
| Q9UHL4 | 457 |
| P24723 | 458 |
| Q02750 | 459 |
| P78417 | 459 |
| P17612 | 459 |
| O00329 | 460 |
| Q9Y6L6 | 460 |
| P35916 | 463 |
| Q16678 | 465 |
| Q12879 | 466 |
| P25103 | 467 |
| P41968 | 471 |
| O60240 | 472 |
| Q9Y694 | 474 |
| Q00534 | 475 |
| P08631 | 476 |
| O43353 | 476 |
| P33527 | 476 |
| Q12884 | 477 |
| O00408 | 478 |
| P51679 | 483 |
| P43166 | 484 |
| Q9Y618 | 484 |
| P11413 | 484 |
| ENSG00000284190 | 485 |
| P17252 | 486 |
| Q9Y6F1 | 486 |
| Q9UKK3 | 490 |
| Q9Y2D0 | 490 |
| O75530 | 492 |
| P00747 | 497 |
| P42338 | 497 |
| P48147 | 497 |
| P08311 | 497 |
| Q86TI2 | 498 |
| Q02127 | 499 |
| Q16832 | 499 |
| Q9H0J9 | 499 |
| Q03164 | 502 |
| P27815 | 502 |
| P61964 | 502 |
| Q9UGN5 | 502 |
| O94806 | 502 |
| P48443 | 503 |
| Q6V1X1 | 504 |
| P22694 | 505 |
| P43686 | 505 |
| P22612 | 505 |
| P47870 | 506 |
| P60896 | 510 |
| P53350 | 510 |
| Q53GL7 | 511 |
| P51843 | 511 |
| P11511 | 512 |
| P05129 | 512 |
| P68366 | 512 |
| Q13118 | 513 |
| P49720 | 513 |
| P68363 | 516 |
| P51665 | 517 |
| Q08345 | 518 |
| P11274 | 518 |
| Q9H2K2 | 519 |
| P11802 | 519 |
| Q15788 | 520 |
| Q9NXA8 | 520 |
| Q13546 | 520 |
| Q13526 | 520 |
| P00734 | 521 |
| P55036 | 522 |
| P41597 | 523 |
| P48556 | 523 |
| Q13224 | 523 |
| Q8N1Q1 | 527 |
| Q00G26 | 528 |
| P52333 | 528 |
| Q96RI1 | 528 |
| O75469 | 528 |
| Q8NFI3 | 529 |
| Q04206 | 529 |
| Q9NSA0 | 530 |
| O95749 | 531 |
| P62333 | 531 |
| Q96RD7 | 532 |
| O14684 | 533 |
| P62191 | 536 |
| P60900 | 536 |
| P68371 | 536 |
| P62195 | 536 |
| P15056 | 538 |
| Q13885 | 540 |
| O94760 | 541 |
| Q13200 | 543 |
| P02766 | 543 |
| P27487 | 546 |
| P29466 | 550 |
| Q9Y253 | 550 |
| P46098 | 550 |
| P42685 | 552 |
| P42574 | 554 |
| Q99571 | 555 |
| Q13509 | 555 |
| Q92753 | 557 |
| P09960 | 558 |
| O43868 | 559 |
| P14920 | 561 |
| P07437 | 561 |
| O14965 | 563 |
| Q09470 | 563 |
| Q16204 | 566 |
| P22748 | 567 |
| O43570 | 567 |
| P49336 | 569 |
| O76074 | 569 |
| Q14534 | 569 |
| Q460N5 | 570 |
| Q9H0H5 | 571 |
| Q71U36 | 572 |
| P04350 | 572 |
| Q12866 | 572 |
| Q9UNA4 | 573 |
| Q9Y233 | 573 |
| Q9H4B7 | 573 |
| Q8TAF3 | 574 |
| P53634 | 574 |
| O94956 | 576 |
| P49841 | 577 |
| Q9UNM6 | 578 |
| Q96SW2 | 579 |
| Q9BVA1 | 579 |
| P30968 | 581 |
| P54750 | 582 |
| P26358 | 585 |
| P00742 | 585 |
| P32297 | 586 |
| P24941 | 587 |
| P20292 | 589 |
| P54289 | 590 |
| Q6PEY2 | 590 |
| P14324 | 590 |
| P22607 | 591 |
| P51813 | 592 |
| P30542 | 592 |
| P35218 | 592 |
| Q3ZCM7 | 592 |
| Q13564 | 593 |
| O15527 | 594 |
| P09874 | 595 |
| Q01064 | 596 |
| O95271 | 596 |
| P56817 | 597 |
| Q15008 | 599 |
| Q9UBT6 | 599 |
| Q8TAA3 | 600 |
| O43174 | 600 |
| P43405 | 600 |
| P57789 | 600 |
| Q9Y698 | 600 |
| P12821 | 602 |
| P08253 | 602 |
| Q9BQE3 | 604 |
| P10276 | 604 |
| P05093 | 604 |
| P54284 | 604 |
| Q9BUF5 | 606 |
| Q9UPP1 | 606 |
| P00749 | 607 |
| P28702 | 607 |
| Q9H2J7 | 607 |
| Q8WTS1 | 608 |
| P50613 | 608 |
| P04406 | 609 |
| P13631 | 612 |
| Q9UM73 | 612 |
| P42684 | 615 |
| P23280 | 616 |
| P11509 | 618 |
| O43242 | 619 |
| P05106 | 619 |
| P04049 | 619 |
| P07451 | 619 |
| Q04912 | 619 |
| P10826 | 620 |
| Q02641 | 620 |
| P62955 | 622 |
| Q08289 | 622 |
| P08581 | 623 |
| O75151 | 625 |
| P04629 | 626 |
| Q06432 | 627 |
| Q96KQ7 | 627 |
| P40925 | 628 |
| P06748 | 628 |
| Q9Y3R4 | 628 |
| Q07820 | 628 |
| P17516 | 629 |
| P45452 | 629 |
| Q99436 | 629 |
| Q6ZMT4 | 630 |
| Q13946 | 630 |
| Q9Y4K0 | 631 |
| Q7Z2W7 | 631 |
| P51160 | 633 |
| P0DPH7 | 634 |
| P47869 | 634 |
| P00390 | 635 |
| Q9Y4D2 | 636 |
| P28222 | 636 |
| Q9Y6Q9 | 637 |
| P17787 | 637 |
| P28221 | 637 |
| Q9NR63 | 638 |
| Q06187 | 639 |
| O14818 | 639 |
| Q14123 | 640 |
| P07947 | 641 |
| O14649 | 641 |
| O94782 | 642 |
| P08514 | 642 |
| P32302 | 642 |
| P30926 | 643 |
| P48169 | 644 |
| Q59H18 | 644 |
| Q16186 | 645 |
| P62942 | 646 |
| P49146 | 647 |
| O15399 | 648 |
| P23458 | 650 |
| P27361 | 652 |
| O60359 | 654 |
| Q13882 | 655 |
| P14635 | 655 |
| Q15878 | 655 |
| P51946 | 655 |
| Q99460 | 657 |
| Q8TDU6 | 659 |
| Q07912 | 659 |
| P31213 | 660 |
| P51948 | 660 |
| O00487 | 662 |
| P78396 | 663 |
| O60391 | 664 |
| Q9UF02 | 664 |
| P02144 | 664 |
| Q9H9B1 | 664 |
| Q8WXS5 | 664 |
| Q8IZS8 | 664 |
| O00232 | 665 |
| P58215 | 666 |
| O00231 | 666 |
| P24385 | 666 |
| P50750 | 667 |
| P07858 | 667 |
| Q00653 | 667 |
| Q8N4C8 | 669 |
| P25098 | 669 |
| P20618 | 670 |
| P78334 | 670 |
| Q9UQ49 | 671 |
| Q86Z02 | 672 |
| P41235 | 673 |
| P21860 | 674 |
| P10398 | 675 |
| Q9UN88 | 675 |
| Q8NE63 | 676 |
| P61073 | 676 |
| P22455 | 677 |
| O60285 | 677 |
| O14976 | 678 |
| P41240 | 679 |
| Q00535 | 679 |
| P21802 | 679 |
| Q16445 | 680 |
| Q96RJ0 | 680 |
| Q99808 | 681 |
| Q9Y5X9 | 681 |
| O15264 | 681 |
| P40306 | 681 |
| O15357 | 681 |
| O15303 | 682 |
| Q9C0B1 | 684 |
| P57764 | 684 |
| Q16348 | 685 |
| Q13772 | 685 |
| P68400 | 685 |
| Q9UBN1 | 686 |
| Q8WWX8 | 686 |
| P33176 | 686 |
| P35998 | 687 |
| P67870 | 687 |
| O60706 | 687 |
| O75909 | 688 |
| P32929 | 688 |
| O43614 | 689 |
| Q7Z3S7 | 689 |
| O95263 | 689 |
| Q15078 | 690 |
| O60658 | 690 |
| P0DP23 | 691 |
| P05181 | 691 |
| O43924 | 691 |
| Q16620 | 693 |
| Q9HBH9 | 694 |
| O60563 | 694 |
| P10619 | 695 |
| Q9UNU6 | 695 |
| P18405 | 695 |
| Q06418 | 696 |
| O43613 | 697 |
| P36544 | 697 |
| O76083 | 697 |
| O00555 | 698 |
| Q16549 | 698 |
| O00305 | 698 |
| P24864 | 700 |
| P08922 | 700 |
| P14735 | 700 |
| Q03431 | 701 |
| Q9BWU1 | 701 |
| O00206 | 701 |
| P00387 | 701 |
| Q14680 | 701 |
| P31749 | 701 |
| Q13956 | 701 |
| P61981 | 701 |
| P08648 | 702 |
| Q9Y4K4 | 702 |
| Q6ZQN7 | 702 |
| P53778 | 702 |
| O14764 | 703 |
| P00352 | 703 |
| Q14957 | 703 |
| O95436 | 703 |
| P10145 | 703 |
| Q9NY91 | 704 |
| Q9BXT2 | 704 |
| P37268 | 704 |
| Q07001 | 705 |
| Q99685 | 705 |
| P00558 | 705 |
| P62993 | 705 |
| P31639 | 706 |
| Q14542 | 706 |
| Q8N1C3 | 707 |
| P42356 | 708 |
| P20815 | 709 |
| Q99519 | 710 |
| P51164 | 710 |
| Q9H3N8 | 710 |
| O14939 | 711 |
| O14757 | 711 |
| Q9H422 | 711 |
| P06756 | 711 |
| Q16513 | 711 |
| P28074 | 711 |
| O15111 | 712 |
| Q9NY47 | 712 |
| Q9UJW3 | 714 |
| Q13393 | 715 |
| Q05397 | 715 |
| Q9Y468 | 716 |
| P05556 | 716 |
| P07510 | 716 |
| P06746 | 717 |
| P10827 | 718 |
| Q9H2X6 | 718 |
| P50281 | 719 |
| P10828 | 720 |
| P07202 | 720 |
| P13866 | 720 |
| P49137 | 720 |
| Q9Y2K2 | 721 |
| O43451 | 721 |
| P58335 | 721 |
| P51449 | 722 |
| P53609 | 722 |
| B2RXH2 | 723 |
| P05091 | 723 |
| O15528 | 723 |
| P25787 | 723 |
| O15530 | 723 |
| P08686 | 723 |
| P22460 | 724 |
| O94759 | 724 |
| P08236 | 725 |
| Q15759 | 725 |
| P25788 | 725 |
| P15538 | 726 |
| P05113 | 727 |
| P54710 | 727 |
| O60755 | 727 |
| O94804 | 727 |
| Q8TCG2 | 728 |
| P07686 | 728 |
| P54709 | 728 |
| P18507 | 728 |
| P08473 | 728 |
| P50993 | 729 |
| P01112 | 729 |
| Q9UBF8 | 729 |
| Q9Y6E0 | 729 |
| Q15046 | 729 |
| O00591 | 730 |
| P42681 | 730 |
| P25786 | 731 |
| O60760 | 731 |
| Q9GZT9 | 731 |
| P28065 | 731 |
| P02708 | 732 |
| Q02083 | 732 |
| O00337 | 732 |
| P52564 | 733 |
| Q15722 | 733 |
| P07205 | 733 |
| Q13586 | 733 |
| O00519 | 734 |
| P06865 | 734 |
| O60341 | 734 |
| P13726 | 734 |
| Q9BTU6 | 735 |
| O75376 | 736 |
| Q15835 | 736 |
| P09769 | 737 |
| P25789 | 737 |
| P03956 | 737 |
| P51955 | 738 |
| Q8IVH8 | 738 |
| Q01970 | 738 |
| O95870 | 739 |
| O76082 | 740 |
| P29375 | 740 |
| O95718 | 740 |
| Q8N2K0 | 740 |
| Q12908 | 740 |
| P04233 | 740 |
| O75365 | 741 |
| Q9H244 | 741 |
| P24462 | 741 |
| P07711 | 742 |
| O14920 | 742 |
| Q9UPY5 | 742 |
| Q99928 | 742 |
| Q9HB55 | 742 |
| P53667 | 743 |
| O15056 | 744 |
| O14744 | 744 |
| P78329 | 744 |
| P01106 | 745 |
| Q8NEV1 | 745 |
| Q9Y6K1 | 746 |
| P03951 | 747 |
| Q9HCR9 | 747 |
| Q9BQB6 | 748 |
| P00750 | 749 |
| P11230 | 749 |
| P04070 | 750 |
| P01116 | 751 |
| O15554 | 751 |
| Q9GZU7 | 751 |
| P34969 | 751 |
| P15144 | 751 |
| Q8TEK3 | 751 |
| P04278 | 751 |
| P17980 | 751 |
| P51812 | 752 |
| Q8TCU5 | 753 |
| P07288 | 753 |
| Q9UHC3 | 754 |
| Q14654 | 754 |
| O43426 | 754 |
| Q9Y243 | 754 |
| O15440 | 754 |
| Q8WWR8 | 754 |
| P00797 | 755 |
| P03952 | 755 |
| P19099 | 755 |
| P07478 | 755 |
| Q08209 | 755 |
| P30304 | 755 |
| Q9Y5X4 | 756 |
| P35913 | 756 |
| P28070 | 756 |
| Q9NP56 | 757 |
| P00748 | 758 |
| P14415 | 758 |
| Q09428 | 759 |
| P78536 | 759 |
| P25024 | 759 |
| Q9NPC1 | 759 |
| P16499 | 760 |
| P40926 | 760 |
| P55157 | 760 |
| Q58F21 | 761 |
| P42680 | 761 |
| P06858 | 761 |
| Q92847 | 761 |
| Q9UP65 | 761 |
| P57059 | 761 |
| P28062 | 762 |
| P04062 | 762 |
| P04183 | 762 |
| P05231 | 763 |
| P16050 | 763 |
| P04271 | 763 |
| P34903 | 764 |
| P31751 | 764 |
| Q14940 | 765 |
| P28066 | 765 |
| Q9HC35 | 766 |
| Q01538 | 766 |
| P12004 | 766 |
| P08842 | 766 |
| P05026 | 767 |
| Q02410 | 768 |
| Q05BQ5 | 769 |
| O00625 | 769 |
| Q12851 | 769 |
| Q9Y5N1 | 769 |
| Q13733 | 770 |
| Q9HAS3 | 770 |
| Q96JB6 | 770 |
| P00338 | 771 |
| P18545 | 772 |
| P09467 | 772 |
| Q06124 | 772 |
| Q8WVY7 | 772 |
| Q05901 | 774 |
| P30559 | 774 |
| P01130 | 775 |
| P21964 | 775 |
| P05023 | 776 |
| Q00613 | 777 |
| P22894 | 777 |
| P30279 | 778 |
| P23921 | 778 |
| P14555 | 778 |
| P22079 | 778 |
| Q7Z418 | 779 |
| P35236 | 779 |
| P07332 | 779 |
| Q15418 | 780 |
| P08263 | 781 |
| Q07973 | 781 |
| P41252 | 782 |
| P11474 | 782 |
| P28072 | 782 |
| P29323 | 782 |
| P48066 | 782 |
| P07477 | 783 |
| P18505 | 787 |
| P19838 | 787 |
| Q15393 | 787 |
| P29597 | 788 |
| Q9H255 | 788 |
| P28845 | 788 |
| Q12974 | 788 |
| Q8IXJ6 | 789 |
| P41146 | 790 |
| Q08881 | 790 |
| P36956 | 791 |
| P25116 | 791 |
| P09848 | 791 |
| P48065 | 791 |
| P36776 | 792 |
| Q9NWT8 | 792 |
| Q14289 | 792 |
| Q8NER1 | 795 |
| P24863 | 795 |
| P30411 | 795 |
| Q16873 | 795 |
| P15328 | 795 |
| Q13093 | 797 |
| P05107 | 797 |
| O00444 | 797 |
| P10253 | 798 |
| Q99640 | 799 |
| Q13043 | 799 |
| P17405 | 799 |
| P53355 | 800 |
| Q96NT5 | 800 |
| P30281 | 800 |
| Q9BV23 | 801 |
| O00142 | 801 |
| P14679 | 801 |
| Q15746 | 803 |
| Q96EB6 | 804 |
| P09211 | 805 |
| P18054 | 805 |
| P29376 | 806 |
| P21709 | 807 |
| P30530 | 807 |
| P34947 | 808 |
| P05362 | 809 |
| P62508 | 811 |
| P20248 | 811 |
| Q16665 | 811 |
| P16083 | 812 |
| Q15825 | 812 |
| P11150 | 812 |
| P04818 | 812 |
| P31644 | 815 |
| Q15116 | 815 |
| Q16739 | 818 |
| Q8IU85 | 819 |
| Q9UHD2 | 819 |
| P05981 | 819 |
| P13637 | 819 |
| Q8N5Y8 | 819 |
| Q9H0K1 | 820 |
| P23946 | 822 |
| P25929 | 822 |
| P19174 | 823 |
| P43220 | 824 |
| Q15465 | 825 |
| P14410 | 826 |
| P36507 | 826 |
| P35030 | 826 |
| Q8NCG7 | 827 |
| P42785 | 827 |
| Q04844 | 828 |
| Q9Y6K9 | 828 |
| P16233 | 829 |
| Q9NYL2 | 829 |
| P30531 | 830 |
| Q9NZQ7 | 830 |
| P34949 | 831 |
| P28566 | 831 |
| Q9NWZ3 | 832 |
| P37088 | 832 |
| P78549 | 833 |
| P20648 | 835 |
| Q96JM7 | 837 |
| P42261 | 837 |
| Q9NS75 | 838 |
| Q2NL67 | 839 |
| Q9BPW9 | 839 |
| Q9BRQ5 | 841 |
| P19784 | 841 |
| Q8WTS6 | 842 |
| Q6PIU2 | 842 |
| Q15125 | 843 |
| Q9BZP6 | 844 |
| Q93096 | 844 |
| Q2TB90 | 845 |
| Q9BU89 | 846 |
| Q9HCG7 | 847 |
| P40763 | 847 |
| Q8TCT1 | 850 |
| P27986 | 850 |
| P19634 | 850 |
| Q8NA19 | 851 |
| Q96SN7 | 851 |
| P16591 | 856 |
| P36639 | 856 |
| Q9BQT8 | 856 |
| P41440 | 857 |
| A5LHX3 | 857 |
| Q9NTG7 | 858 |
| P42224 | 858 |
| P29317 | 859 |
| P25105 | 861 |
| Q8TDX5 | 861 |
| P30939 | 861 |
| Q99835 | 862 |
| P25025 | 863 |
| P28300 | 863 |
| P23443 | 865 |
| Q99873 | 865 |
| Q9HCN6 | 866 |
| P14207 | 869 |
| P22310 | 870 |
| P35573 | 877 |
| P31939 | 878 |
| Q8NBP7 | 882 |
| P35228 | 882 |
| P19440 | 883 |
| P29275 | 887 |
| P21731 | 888 |
| Q14994 | 890 |
| Q96FI4 | 893 |
| P35222 | 896 |
| Q99504 | 898 |
| Q96LD8 | 905 |
| Q9HC16 | 906 |
| Q9NYY3 | 909 |
| Q9UBM7 | 910 |
| Q86TP1 | 910 |
| P35346 | 911 |
| P23141 | 913 |
| P30518 | 916 |
| P20701 | 916 |
| P31391 | 920 |
| P22102 | 922 |
| Q9H4B4 | 922 |
| P22001 | 925 |
| P29474 | 926 |
| P27695 | 944 |
| P29475 | 945 |
| P30536 | 946 |
| P29372 | 949 |

**Supplementary Table 3. Ranking of all protein structural features in the model.**

| Protein Structural Feature | Rank |
| --- | --- |
| Number of Amino Acids R in H Regions | 1 |
| Number of Amino Acids T in H Regions | 2 |
| Number of Amino Acids L in H Regions | 2 |
| Number of Amino Acids G in T Regions | 3 |
| Number of Amino Acids I in H Regions | 5 |
| Number of Amino Acids S in H Regions | 5 |
| Number of Contacts | 7 |
| Number of Amino Acids V in H Regions | 8 |
| Number of Amino Acids K in H Regions | 8 |
| Number of Amino Acids L in T Regions | 9 |
| Number of G Regions | 9 |
| Number of Amino Acids S in S Regions | 10 |
| Number of Amino Acids Q in H Regions | 10 |
| Number of Amino Acids S in T Regions | 12 |
| Number of Amino Acids P in T Regions | 12 |
| Number of Amino Acids L in S Regions | 14 |
| Number of Amino Acids N in T Regions | 14 |
| Number of Amino Acids W in H Regions | 15 |
| Number of Amino Acids R in G Regions | 16 |
| Number of Amino Acids S in G Regions | 16 |
| Number of Amino Acids Q in T Regions | 16 |
| Number of Amino Acids E in H Regions | 17 |
| Number of Amino Acids N in H Regions | 17 |
| Number of Amino Acids R in E Regions | 18 |
| Number of Amino Acids R in T Regions | 18 |
| Number of Amino Acids R in S Regions | 19 |
| Number of Amino Acids S in B Regions | 20 |
| Number of Amino Acids P in H Regions | 21 |
| Number of Amino Acids Q in S Regions | 21 |
| Number of Amino Acids K in T Regions | 21 |
| Number of H Regions | 22 |
| Number of E Regions | 23 |
| Number of Amino Acids M in H Regions | 23 |
| Number of Amino Acids G in S Regions | 23 |
| Number of Amino Acids T in E Regions | 23 |
| Number of Amino Acids T in S Regions | 24 |
| Number of Amino Acids L in G Regions | 25 |
| Number of Amino Acids P in G Regions | 26 |
| Number of Amino Acids N in S Regions | 26 |
| Number of Amino Acids P in E Regions | 26 |
| Number of Amino Acids I in E Regions | 27 |
| Number of Amino Acids P in S Regions | 27 |
| Number of Amino Acids H in S Regions | 27 |
| Number of Amino Acids Q in G Regions | 28 |
| Number of Amino Acids I in G Regions | 28 |
| Number of Amino Acids L in B Regions | 28 |
| Number of Amino Acids V in E Regions | 28 |
| Number of Amino Acids H in T Regions | 29 |
| Number of Amino Acids I in Aggregation Prone Regions | 29 |
| Number of Amino Acids H in E Regions | 29 |
| Number of Amino Acids G in H Regions | 29 |
| Number of Amino Acids M in E Regions | 29 |
| Number of Amino Acids M in S Regions | 29 |
| Number of Amino Acids H in H Regions | 30 |
| Number of Amino Acids K in S Regions | 30 |
| Number of Amino Acids M in T Regions | 30 |
| Number of Amino Acids K in G Regions | 31 |
| Number of Amino Acids T in T Regions | 31 |
| Number of Amino Acids K in E Regions | 31 |
| Number of Amino Acids Y in B Regions | 32 |
| Number of Amino Acids Y in H Regions | 32 |
| Number of Amino Acids N in G Regions | 32 |
| Number of Amino Acids N in E Regions | 33 |
| Number of Amino Acids T in G Regions | 33 |
| Number of Amino Acids G in G Regions | 33 |
| Number of Amino Acids M in G Regions | 33 |
| Number of Amino Acids L in E Regions | 33 |
| Number of Amino Acids M in Aggregation Prone Regions | 34 |
| Number of Amino Acids F in T Regions | 34 |
| Number of Amino Acids G in E Regions | 34 |
| Number of Amino Acids W in S Regions | 35 |
| Number of S Regions | 35 |
| Number of Amino Acids I in S Regions | 35 |
| Number of Amino Acids V in S Regions | 35 |
| Number of Amino Acids I in T Regions | 35 |
| Number of Amino Acids H in G Regions | 35 |
| Number of Amino Acids V in T Regions | 36 |
| Number of B Regions | 36 |
| Number of Amino Acids F in H Regions | 39 |
| Number of Amino Acids Y in T Regions | 39 |
| Number of Amino Acids Y in E Regions | 39 |
| Number of T Regions | 41 |
| Number of Amino Acids W in G Regions | 42 |
| Number of Amino Acids F in S Regions | 44 |
| Number of Amino Acids V in G Regions | 45 |
| Number of Amino Acids Y in S Regions | 46 |
| Number of Amino Acids F in G Regions | 52 |
| Number of Amino Acids E in T Regions | 53 |
| Number of Amino Acids F in E Regions | 54 |
| Number of Amino Acids E in S Regions | 54 |
| Number of Amino Acids E in G Regions | 55 |
| Number amino acid in globular region C | 55 |
| Number amino acid in globular region T | 55 |
| Number amino acid in globular region I | 56 |
| Number amino acid in globular region G | 56 |
| Number amino acid in helix region A | 56 |
| Number amino acid in globular region L | 56 |
| Number amino acid in globular region E | 56 |
| Number amino acid in globular region N | 57 |
| Number amino acid in globular region Q | 57 |
| Number amino acid in globular region P | 57 |
| Number amino acid in globular region D | 58 |
| Number amino acid in globular region K | 58 |
| Number amino acid in globular region V | 58 |
| Number amino acid in disordered region G | 58 |
| Number amino acid in globular region F | 58 |
| Number amino acid in disordered region S | 58 |
| Number amino acid in disordered region T | 58 |
| Number amino acid in globular region H | 58 |
| Number amino acid in disordered region E | 59 |
| Number amino acid in disordered region L | 59 |
| Number amino acid in conserved region M | 59 |
| Number amino acid in helix region C | 59 |
| Number amino acid in globular region M | 59 |
| Number amino acid in helix region M | 60 |
| Number amino acid in globular region A | 60 |
| Number amino acid in globular region Y | 60 |
| Number amino acid in helix region D | 60 |
| Number amino acid in globular region S | 61 |
| Number amino acid in disordered region I | 61 |
| Minimum Distance to Center of Mass | 61 |
| Number of Amino Acids E in E Regions | 61 |
| Number of Amino Acids S in E Regions | 61 |
| Number of Amino Acids D in T Regions | 61 |
| Number amino acid in globular region R | 61 |
| Number amino acid in helix region E | 61 |
| Number of Amino Acids E in B Regions | 62 |
| Number amino acid in globular region W | 62 |
| Number of Amino Acids D in H Regions | 62 |
| Negative region lengths | 62 |
| Number amino acid in helix region W | 64 |
| Number amino acid in helix region I | 64 |
| Number of Amino Acids D in S Regions | 64 |
| Number amino acid in helix region K | 65 |
| Number amino acid in helix region G | 66 |
| Number amino acid in helix region F | 66 |
| Number amino acid in helix region P | 66 |
| Number amino acid in helix region L | 66 |
| Number amino acid in helix region N | 66 |
| Number amino acid in helix region Y | 67 |
| Number of Amino Acids C in H Regions | 68 |
| Maximum Distance to Center of Mass | 68 |
| Number of Amino Acids D in G Regions | 68 |
| Number of Amino Acids D in E Regions | 69 |
| Number amino acid in loop region E | 69 |
| Number amino acid in helix region S | 70 |
| Number of Amino Acids Q in E Regions | 70 |
| Number amino acid in helix region R | 70 |
| Number amino acid in helix region T | 71 |
| Number of Amino Acids C in T Regions | 71 |
| Number of Amino Acids C in S Regions | 72 |
| Number amino acid in loop region G | 72 |
| Number of Amino Acids L in Aggregation Prone Regions | 74 |
| Number amino acid in loop region P | 74 |
| Number amino acid in helix region V | 75 |
| Number amino acid in loop region R | 75 |
| Number of Amino Acids W in Aggregation Prone Regions | 77 |
| Number of Amino Acids A in H Regions | 77 |
| Number amino acid in loop region L | 79 |
| Number of Amino Acids G in B Regions | 80 |
| Number amino acid in loop region I | 80 |
| Number amino acid in loop region F | 81 |
| Number of Amino Acids A in T Regions | 81 |
| Number amino acid in loop region K | 81 |
| Number amino acid in loop region D | 81 |
| Number of conserved regions | 83 |
| Number of disordered regions | 84 |
| Number amino acid in loop region N | 85 |
| Number of globular regions | 85 |
| Number amino acid in loop region M | 85 |
| Number of helix | 86 |
| Number amino acid in loop region Q | 86 |
| Number amino acid in loop region S | 86 |
| Number of loops | 86 |
| Number of negative regions | 87 |
| Number of nonconserved regions | 88 |
| Number amino acid in loop region H | 89 |
| Length of protein | 89 |
| Number of positive regions | 90 |
| Length of T Regions | 90 |
| Number of Amino Acids C in G Regions | 90 |
| Number of Amino Acids C in E Regions | 90 |
| Number amino acid in loop region V | 90 |
| Number of negative regions with length >=30 | 91 |
| Number amino acid in loop region T | 91 |
| Number amino acid in nonconserved region A | 91 |
| Number of predictions | 92 |
| Number of Amino Acids A in S Regions | 94 |
| Number of transmembrane helices | 94 |
| Number of sheets | 94 |
| Positive region lengths | 95 |
| Number amino acid in nonconserved region D | 95 |
| Number of Amino Acids F in Aggregation Prone Regions | 96 |
| Number amino acid in nonconserved region L | 96 |
| Number amino acid in nonconserved region E | 96 |
| Number amino acid in protein E | 98 |
| Number amino acid in nonconserved region K | 98 |
| Number amino acid in nonconserved region R | 98 |
| Number of Amino Acids A in G Regions | 99 |
| Number amino acid in nonconserved region Q | 99 |
| Number amino acid in disordered region R | 99 |
| Number amino acid in nonconserved region M | 99 |
| Number amino acid in nonconserved region S | 99 |
| Number amino acid in disordered region V | 100 |
| Number of Amino Acids A in E Regions | 100 |
| Number amino acid in protein A | 100 |
| Number amino acid in disordered region D | 101 |
| Length of S Regions | 102 |
| Number amino acid in nonconserved region T | 102 |
| Number amino acid in coil region T | 102 |
| Number amino acid in nonconserved region P | 103 |
| Total length of conserved regions | 103 |
| Number amino acid in protein D | 104 |
| Number amino acid in nonconserved region V | 104 |
| Total length of disordered regions | 104 |
| Number amino acid in protein C | 104 |
| Number amino acid in protein F | 106 |
| Number amino acid in protein G | 106 |
| Total length of globular regions | 106 |
| Number amino acid in protein K | 107 |
| Total length of helix regions | 107 |
| Number amino acid in protein I | 108 |
| Number amino acid in protein L | 108 |
| Total length of loop regions | 108 |
| Total length of nonconserved regions | 109 |
| Number of Aggregation Prone Regions | 109 |
| Length of H Regions | 110 |
| Number amino acid in protein H | 110 |
| Number amino acid in helix region H | 110 |
| Number amino acid in sheet region Y | 110 |
| Number amino acid in protein M | 111 |
| Total length of sheet regions | 111 |
| Number of Amino Acids V in Aggregation Prone Regions | 112 |
| Number amino acid in loop region A | 113 |
| Number of Amino Acids W in T Regions | 114 |
| Number amino acid in sheet region V | 114 |
| Number amino acid in sheet region S | 116 |
| Number amino acid in helix region Q | 117 |
| Y/n anchor regions | 117 |
| Number amino acid in protein N | 118 |
| Length of G Regions | 118 |
| Number amino acid in protein P | 118 |
| Y/n disordered regions | 119 |
| Number amino acid in protein Q | 120 |
| Number amino acid in protein R | 121 |
| Number amino acid in protein T | 122 |
| Number amino acid in protein S | 123 |
| Number amino acid in sheet region L | 123 |
| Number amino acid in protein W | 123 |
| Length of E Regions | 123 |
| Number amino acid in protein V | 124 |
| Y/n globular regions | 124 |
| Number amino acid in protein Y | 124 |
| Number amino acid in sheet region I | 125 |
| Number amino acid in sheet region H | 125 |
| Length of B Regions | 125 |
| Length of Aggregation Prone Regions | 126 |
| Average Distance to Center of Mass | 126 |
| Number amino acid in sheet region C | 128 |
| Number amino acid in sheet region G | 128 |
| Number amino acid in sheet region F | 128 |
| automated matches | 133 |
| Number amino acid in nonconserved region I | 138 |
| Total length of coil regions | 141 |
| Number amino acid in disordered region M | 142 |
| Number amino acid in conserved region S | 142 |
| Number amino acid in coil region E | 145 |
| Number amino acid in sheet region T | 156 |
| Number of Amino Acids H in Aggregation Prone Regions | 157 |
| Number amino acid in sheet region R | 158 |
| Number of coils | 166 |
| Number amino acid in nonconserved region G | 168 |
| Number of Amino Acids Y in G Regions | 168 |
| Number amino acid in sheet region A | 169 |
| Number of anchor regions | 169 |
| Number amino acid in disordered region N | 184 |
| Number amino acid in disordered region A | 184 |
| Number amino acid in coil region L | 185 |
| Number amino acid in anchor region W | 185 |
| Number amino acid in loop region C | 195 |
| Number of Amino Acids V in B Regions | 201 |
| Number amino acid in sheet region K | 207 |
| Number of Amino Acids W in E Regions | 208 |
| Number amino acid in loop region W | 211 |
| Number amino acid in loop region Y | 217 |
| Number amino acid in disordered region P | 224 |
| Number amino acid in disordered region H | 225 |
| Number amino acid in nonconserved region N | 227 |
| Number of Amino Acids E in Aggregation Prone Regions | 228 |
| Number of Amino Acids D in B Regions | 236 |
| Number of Amino Acids N in B Regions | 240 |
| P-loop containing nucleoside triphosphate hydrolases | 246 |
| Number amino acid in sheet region M | 247 |
| Number of Amino Acids I in B Regions | 248 |
| Number of Amino Acids Y in Aggregation Prone Regions | 254 |
| Number amino acid in nonconserved region F | 258 |
| Number of Amino Acids F in B Regions | 261 |
| Number amino acid in disordered region W | 267 |
| Number amino acid in disordered region Q | 267 |
| Number amino acid in disordered region F | 267 |
| Number of Amino Acids R in B Regions | 267 |
| Number amino acid in coil region R | 268 |
| Number amino acid in coil region V | 269 |
| Number amino acid in anchor region G | 269 |
| Number amino acid in anchor region V | 269 |
| Number amino acid in anchor region D | 269 |
| Number amino acid in anchor region S | 269 |
| Number of Amino Acids S in Aggregation Prone Regions | 271 |
| Number amino acid in nonconserved region Y | 273 |
| Number of Amino Acids P in B Regions | 276 |
| Number amino acid in sheet region W | 280 |
| Number amino acid in sheet region Q | 283 |
| Number amino acid in sheet region D | 296 |
| Number amino acid in coil region W | 310 |
| Number amino acid in anchor region F | 310 |
| Number amino acid in anchor region T | 310 |
| Number amino acid in coil region K | 310 |
| Number amino acid in anchor region L | 311 |
| Number of Amino Acids T in Aggregation Prone Regions | 320 |
| Number of Amino Acids Q in Aggregation Prone Regions | 320 |
| Number of Amino Acids P in Aggregation Prone Regions | 322 |
| Number amino acid in sheet region P | 326 |
| Number amino acid in sheet region N | 328 |
| Number of Amino Acids G in Aggregation Prone Regions | 336 |
| Number of Amino Acids C in Aggregation Prone Regions | 341 |
| Number amino acid in disordered region K | 350 |
| Number amino acid in conserved region N | 351 |
| Number amino acid in coil region M | 352 |
| Number amino acid in anchor region R | 352 |
| Number amino acid in anchor region E | 353 |
| Number amino acid in anchor region M | 353 |
| Number amino acid in anchor region P | 353 |
| Number of Amino Acids T in B Regions | 354 |
| Number of Amino Acids A in Aggregation Prone Regions | 358 |
| Number of Amino Acids N in Aggregation Prone Regions | 363 |
| Number amino acid in sheet region E | 379 |
| Number amino acid in nonconserved region C | 384 |
| Total length of anchor regions | 388 |
| Number amino acid in disordered region Y | 392 |
| Number amino acid in conserved region C | 393 |
| Number amino acid in coil region S | 394 |
| Number amino acid in coil region H | 394 |
| Number amino acid in anchor region N | 394 |
| Number of Amino Acids K in B Regions | 403 |
| ABC transporter-like | 407 |
| ABC transporter type 1- transmembrane domain | 408 |
| ABC transporter transmembrane region | 408 |
| ABC transporter ATPase domain-like | 409 |
| AAA+ ATPase domain | 409 |
| Number amino acid in nonconserved region H | 431 |
| Number amino acid in disordered region C | 434 |
| Number amino acid in coil region F | 435 |
| Number amino acid in anchor region K | 435 |
| Number amino acid in coil region G | 435 |
| Number of Amino Acids R in Aggregation Prone Regions | 436 |
| Number amino acid in coil region D | 436 |
| Number amino acid in anchor region C | 436 |
| Number amino acid in anchor region H | 436 |
| Number of Amino Acids Q in B Regions | 443 |
| Number of Amino Acids M in B Regions | 447 |
| Number of Amino Acids H in B Regions | 448 |
| Number of Amino Acids K in Aggregation Prone Regions | 448 |
| Number of Amino Acids W in B Regions | 454 |
| Number amino acid in conserved region G | 474 |
| Number amino acid in conserved region W | 475 |
| Number amino acid in conserved region Y | 476 |
| Number amino acid in conserved region V | 476 |
| Number amino acid in conserved region L | 476 |
| Number amino acid in conserved region K | 476 |
| Number amino acid in conserved region H | 476 |
| Number amino acid in coil region Y | 476 |
| Number amino acid in conserved region T | 476 |
| Number amino acid in coil region N | 476 |
| Number amino acid in conserved region E | 476 |
| Number amino acid in coil region Q | 477 |
| Number amino acid in conserved region F | 477 |
| Number amino acid in conserved region R | 477 |
| Number amino acid in coil region C | 477 |
| Number amino acid in conserved region A | 477 |
| Number amino acid in conserved region Q | 477 |
| Number amino acid in coil region A | 477 |
| Number amino acid in coil region I | 477 |
| Number amino acid in conserved region P | 477 |
| Number amino acid in conserved region D | 477 |
| Number amino acid in anchor region Q | 477 |
| Number amino acid in conserved region I | 477 |
| Number amino acid in coil region P | 477 |
| Number amino acid in anchor region Y | 477 |
| Number amino acid in anchor region I | 478 |
| Number amino acid in anchor region A | 478 |
| Number of Amino Acids D in Aggregation Prone Regions | 487 |
| Number of Amino Acids C in B Regions | 507 |
| Number of positive regions with length >=30 | 508 |
| Number of Amino Acids A in B Regions | 518 |
| Number amino acid in nonconserved region W | 518 |
| Total length tmh regions | 528 |
| Y/n tmh regions | 542 |
| Sodium:neurotransmitter symporter- serotonin- N-terminal | 545 |
| beta-Grasp (ubiquitin-like) | 549 |
| Zinc finger- nuclear hormone receptor-type | 551 |
| Voltage-gated calcium channel subunit alpha- C-terminal | 559 |
| Voltage-gated Na+ ion channel- cytoplasmic domain | 559 |
| Voltage-dependent calcium channel- alpha-1 subunit- IQ domain | 560 |
| Voltage-dependent L-type calcium channel- IQ-associated domain | 560 |
| Tyrosine-protein kinase- catalytic domain | 568 |
| Tyrosine-protein kinase ABL- SH2 domain | 572 |
| TIM beta/alpha-barrel | 583 |
| Sterile alpha motif domain | 586 |
| Sodium ion transport-associated | 588 |
| Serine-threonine/tyrosine-protein kinase- catalytic domain | 591 |
| Zinc finger- UBP-type | 593 |
| SH3 domain | 599 |
| SH2-like | 599 |
| SH2 domain | 600 |
| Receptor L-domain | 610 |
| Protein kinases- catalytic subunit | 616 |
| Protein kinase-like (PK-like) | 616 |
| Trypsin-like serine proteases | 617 |
| Protein kinase domain | 617 |
| The "swivelling" beta/beta/alpha domain | 623 |
| Pleckstrin homology domain | 629 |
| alpha/beta-Hydrolases | 633 |
| Serine proteases- trypsin domain | 633 |
| alpha/beta-Hammerhead | 633 |
| [2Fe-2S]-binding | 634 |
| Zincin-like | 634 |
| Rhodanese/Cell cycle control phosphatase | 649 |
| UDP-glycosyltransferase family- conserved site | 649 |
| Rhodanese-like domain | 649 |
| Tyrosine-protein kinase ephrin type A/B receptor-like | 651 |
| Tyrosine-protein kinase JAK2- SH2 domain | 654 |
| Protein-arginine deiminase- C-terminal | 656 |
| Protein-arginine deiminase (PAD)- central domain | 657 |
| Protein-arginine deiminase (PAD) N-terminal | 657 |
| PDEase | 659 |
| Nuclear receptor ligand-binding domain | 665 |
| TOPRIM domain | 666 |
| Nuclear receptor | 666 |
| Nuclear hormone receptor- ligand-binding domain | 667 |
| NADP-dependent oxidoreductase domain | 673 |
| NAD(P)-linked oxidoreductase | 673 |
| Phosphatidylinositol 3-/4-kinase- catalytic domain | 679 |
| YihX-like | 681 |
| Major facilitator superfamily domain | 681 |
| WD40-repeat-containing domain | 683 |
| Leucine-rich repeat- LRR (right-handed beta-alpha superhelix) | 689 |
| L domain-like | 693 |
| L domain | 694 |
| Tyrosine-protein kinase Lyn- SH3 domain | 695 |
| Knottins (small inhibitors- toxins- lectins) | 695 |
| Tyrosine-protein kinase Lyn- SH2 domain | 695 |
| Protein kinase- C-terminal | 700 |
| Ion transport domain | 700 |
| Protein kinase C-like- phorbol ester/diacylglycerol-binding domain | 701 |
| Topoisomerase I C-terminal domain | 703 |
| Oestrogen-type nuclear receptor final C-terminal domain | 705 |
| Immunoglobulin-like domain | 705 |
| Immunoglobulin-like beta-sandwich | 706 |
| Immunoglobulin subtype 2 | 706 |
| Immunoglobulin subtype | 706 |
| Immunoglobulin I-set | 707 |
| Immunoglobulin | 707 |
| von Willebrand factor- type A | 713 |
| NAD(P)-binding Rossmann-fold domains | 716 |
| Multidomain sulfurtransferase (rhodanese) | 718 |
| Phosphoinositide 3-kinase- accessory (PIK) domain | 718 |
| HD/PDEase domain | 719 |
| HD-domain/PDEase-like | 719 |
| Phosphatidylinositol 3-kinase- C2 domain | 719 |
| Phosphatidylinositol 3-kinase adaptor-binding (PI3K ABD) domain | 720 |
| Phosphatidylinositol 3-kinase Ras-binding (PI3K RBD) domain | 720 |
| Growth factor receptor domain 4 | 720 |
| Growth factor receptor domain | 721 |
| SH3-like barrel | 723 |
| S-adenosyl-L-methionine-dependent methyltransferases | 728 |
| Long alpha-hairpin | 728 |
| Glucocorticoid receptor-like (DNA-binding domain) | 729 |
| Peptidase C14A- caspase catalytic domain | 730 |
| Peptidase C14- caspase non-catalytic subunit p10 | 730 |
| Ubiquitin-conjugating enzyme E2 | 730 |
| Peptidase C14- p20 domain | 730 |
| GPCR- rhodopsin-like- 7TM | 732 |
| Rho GTPase-activating protein domain | 733 |
| UBC-related | 733 |
| UBC-like | 733 |
| Tyrosine-protein kinase- receptor Tie-2- Ig-like domain 1- N-terminal | 733 |
| PSI domain | 734 |
| Kringle-like | 736 |
| Furin-like cysteine-rich domain | 736 |
| PIK-related kinase- FAT | 738 |
| PIK-related kinase | 738 |
| Fibronectin type III | 742 |
| PAS domain | 743 |
| Prokaryotic proteases | 747 |
| Thioesterase | 747 |
| Predicted HAD-superfamily phosphatase- subfamily IA/Epoxide hydrolase- N-terminal | 747 |
| Potassium channel domain | 749 |
| I set domains | 750 |
| F-actin binding | 751 |
| Histone deacetylase- glutamine rich N-terminal domain | 751 |
| Histone deacetylase domain | 752 |
| Histidine kinase/HSP90-like ATPase | 752 |
| Neurotransmitter-gated ion-channel transmembrane domain | 753 |
| Neurotransmitter-gated ion-channel ligand-binding domain | 753 |
| p53-like transcription factors | 755 |
| Sirtuin family- catalytic core domain | 756 |
| NET domain | 756 |
| bi-CXXC zinc finger-like | 756 |
| EGF-like domain | 758 |
| Molybdopterin dehydrogenase- FAD-binding | 760 |
| Zinc finger- PHD-type | 760 |
| Zinc finger- PHD-finger | 761 |
| Zinc finger- CXXC-type | 762 |
| GroES-like | 763 |
| Metalloproteases ("zincins")- catalytic domain | 763 |
| GroEL-like chaperone- apical domain | 763 |
| Zinc finger- C5HC2-type | 763 |
| Peptidoglycan binding-like | 763 |
| GroEL apical domain-like | 763 |
| Peptidase- metallopeptidase | 764 |
| Xanthine dehydrogenase- small subunit | 765 |
| SH3-domain | 765 |
| Vps4 oligomerisation- C-terminal | 767 |
| SAM/Pointed domain | 768 |
| SAM domain-like | 768 |
| Peptidase M10A- catalytic domain | 769 |
| Peptidase M10- metallopeptidase | 769 |
| Galactose-binding domain-like | 772 |
| Receptor- ligand binding region | 776 |
| Tyrosine-protein kinase Yes- SH3 domain | 777 |
| Fyn/Yrk- SH3 domain | 777 |
| Kringle modules | 778 |
| Cytochrome P450 | 778 |
| Kringle | 778 |
| Kazal domain | 780 |
| Janus kinase 2- pseudokinase domain | 781 |
| Janus kinase 2- catalytic domain | 781 |
| PGBD-like | 782 |
| Trefoil/Plexin domain-like | 784 |
| Protein kinase cysteine-rich domain (cys2- phorbol-binding domain) | 784 |
| Transthyretin/hydroxyisourate hydrolase domain | 784 |
| Class A G protein-coupled receptor (GPCR)-like | 785 |
| Profilin-like | 789 |
| Tetramerization domain of potassium channels | 789 |
| Polyketide synthase- phosphopantetheine-binding domain | 791 |
| Polyketide synthase- ketoreductase domain | 791 |
| Polyketide synthase- enoylreductase domain | 791 |
| Synaptotagmin-like (S variant) | 791 |
| Polyketide synthase- dehydratase domain | 792 |
| Carbonic anhydrase | 792 |
| Polyketide synthase- beta-ketoacyl synthase domain | 792 |
| Polyketide synthase- acyl transferase domain | 792 |
| Eukaryotic proteases | 794 |
| NUC194 | 796 |
| Sir2 family of transcriptional regulators | 798 |
| beta-hairpin-alpha-hairpin repeat | 798 |
| beta-beta-alpha zinc fingers | 798 |
| Phosphopantetheine binding ACP domain | 799 |
| Sema domain | 800 |
| Myc-type- basic helix-loop-helix (bHLH) domain | 800 |
| Zinc finger- PARP-type | 803 |
| Zinc finger- CCCH-type | 804 |
| Zinc finger C2H2-type | 805 |
| Yippee/Mis18/Cereblon | 805 |
| Matrix metalloproteases- catalytic domain | 806 |
| WWE domain | 806 |
| Dihydrofolate reductase-like | 807 |
| WW domain-like | 807 |
| Dihydrofolate reductase domain | 807 |
| WW domain | 807 |
| WGR domain-like | 807 |
| MMP N-terminal domain | 808 |
| WGR domain | 808 |
| MAPEG domain-like | 809 |
| MAPEG domain | 809 |
| Peptidase M1- membrane alanine aminopeptidase- N-terminal | 811 |
| Amine receptor-like | 811 |
| VIT domain | 812 |
| Ubiquitin-like | 813 |
| Alpha carbonic anhydrase | 814 |
| Ubiquitin specific protease domain | 814 |
| Ubiquitin specific peptidase 1 | 815 |
| Aldo-keto reductases (NADP) | 815 |
| UCH-binding domain | 816 |
| RHIM domain | 819 |
| Tyrosine-protein kinase Frk- SH2 domain | 821 |
| JmjN domain | 822 |
| JmjC domain | 822 |
| Tyrosine-dependent oxidoreductases | 822 |
| AGC-kinase- C-terminal | 822 |
| Tyrosine specific protein phosphatases domain | 823 |
| Tubulin/FtsZ- GTPase domain | 824 |
| Tubulin/FtsZ- 2-layer sandwich domain | 825 |
| PAS fold | 826 |
| Fibroblast growth factor receptor 1- catalytic domain | 826 |
| 35-cyclic nucleotide phosphodiesterase- catalytic domain | 827 |
| Trans-Isoprenyl Diphosphate Synthases- head-to-head | 827 |
| Toll/interleukin-1 receptor homology (TIR) domain | 828 |
| Thrombin light chain | 829 |
| Outer mitochondrial membrane protein mitoNEET-like | 830 |
| FERM domain | 830 |
| Nuclear/hormone receptor activator site AF-1 | 831 |
| Potassium channel tetramerisation-type BTB domain | 832 |
| FATC domain | 832 |
| IPT domain | 833 |
| FAD-binding- type 2 | 833 |
| Poly(ADP-ribose) polymerase- catalytic domain | 835 |
| Cadherin | 835 |
| Squalene epoxidase | 836 |
| Plexin repeat | 837 |
| Pleckstrin-homology domain (PH domain) | 837 |
| Plant lipoxigenases | 838 |
| Hemopexin-like domain | 838 |
| Ephrin receptor- transmembrane domain | 839 |
| Ephrin receptor ligand binding domain | 839 |
| beta-clip | 840 |
| CARD domain | 840 |
| C2 domain | 842 |
| Second polo-box domain | 842 |
| HAD-like | 844 |
| Methyltransferase type 12 | 845 |
| Peptidase S9- prolyl oligopeptidase- catalytic domain | 848 |
| SET domain | 850 |
| SANT/Myb domain | 850 |
| DTHCT | 850 |
| SANT domain | 851 |
| Voltage-dependent calcium channel- alpha-2/delta subunit- conserved region | 851 |
| Voltage-dependent L-type calcium channel subunit beta-3- SH3 domain | 852 |
| DNA topoisomerase- type IIA- subunit B- domain 2 | 852 |
| DNA topoisomerase- type IIA- subunit A/C-terminal | 853 |
| Peptidase M1- leukotriene A4 hydrolase/aminopeptidase C-terminal | 853 |
| Amine oxidase | 853 |
| VWA N-terminal | 854 |
| Rpn11/EIF3F- C-terminal | 854 |
| DNA topoisomerase 2- TOPRIM domain | 854 |
| UmuC domain | 854 |
| Pentein- beta/alpha-propeller | 856 |
| Pentein | 856 |
| GTPase activation domain- GAP | 856 |
| DNA gyrase B- C-terminal domain-like | 856 |
| Ubiquitin domain | 857 |
| DNA gyrase B- C-terminal domain | 857 |
| Rel/Dorsal transcription factors- DNA-binding domain | 858 |
| Rel homology domain (RHD)- DNA-binding domain | 858 |
| Tyrosine-protein kinase- non-receptor- TYK2- N-terminal | 859 |
| Rel homology dimerisation domain | 859 |
| Tyrosine-protein kinase receptor NTRK- C2-Ig-like domain | 859 |
| GAF domain | 860 |
| Ras-binding domain- RBD | 860 |
| Raf-like Ras-binding | 860 |
| POZ domain | 861 |
| RGS domain | 861 |
| PLAT/LH2 domain | 862 |
| Ketoacyl-synthetase- C-terminal extension | 862 |
| Tyrosine-protein kinase Fgr- SH2 domain | 863 |
| Tyrosine-protein kinase BTK- SH3 domain | 863 |
| Protein-tyrosine phosphatase- catalytic | 864 |
| PHD domain | 865 |
| PH domain-like barrel | 865 |
| Iron-sulfur cluster-binding zinc finger CDGSH type | 865 |
| PH domain-like | 865 |
| Iron sulphur-containing domain- CDGSH-type | 866 |
| Iron sulphur domain-containing- mitoNEET- N-terminal | 866 |
| Transmembrane helix hairpin | 868 |
| Protein kinase B alpha- catalytic domain | 869 |
| Proteasome subunits | 869 |
| Proteasome component (PCI) domain | 870 |
| Proteasome beta subunit- C-terminal | 870 |
| Proteasome alpha-subunit- N-terminal domain | 870 |
| FKBP12-rapamycin binding domain | 871 |
| Nucleoside transporter/FeoB GTPase- Gate domain | 872 |
| Nuclear receptor coactivator- receptor-binding domain | 873 |
| Nuclear receptor coactivator- Ncoa-type- interlocking | 874 |
| Nuclear receptor coactivator interlocking domain | 874 |
| THIF-type NAD/FAD binding fold | 874 |
| Carboxylesterase- type B | 875 |
| Poly(ADP-ribose) polymerase- regulatory domain | 876 |
| Polo-like kinase 1- catalytic domain | 877 |
| Extended AAA-ATPase domain | 877 |
| Nicotinic receptor ligand binding domain-like | 877 |
| Sterol-sensing domain | 877 |
| Neurotransmitter-gated ion-channel transmembrane pore | 877 |
| Eukaryotic DNA topoisomerase I- dispensable insert domain | 878 |
| Eukaryotic DNA topoisomerase I- catalytic core | 878 |
| Eukaryotic DNA topoisomerase I- N-terminal DNA-binding fragment | 879 |
| CO dehydrogenase molybdoprotein N-domain-like | 879 |
| CO dehydrogenase flavoprotein- C-terminal | 879 |
| CO dehydrogenase ISP C-domain like | 880 |
| Serine aminopeptidase- S33 | 883 |
| alpha-alpha superhelix | 883 |
| C-terminal associated domain of TOPRIM | 884 |
| Bromodomain protein 4- C-terminal | 884 |
| Bromodomain | 884 |
| Zinc finger- RING-type | 885 |
| SYK/ZAP-70- N-terminal SH2 domain | 885 |
| Zinc finger- MYND-type | 886 |
| Domain of unknown function DUF3385- target of rapamycin protein | 887 |
| Band 4.1 domain | 887 |
| Peptidyl-prolyl cis-trans isomerase- PpiC-type | 888 |
| Peptidase S9A- N-terminal domain | 889 |
| Macro domain | 890 |
| Dbl homology (DH) domain | 892 |
| Ankyrin repeat-containing domain | 893 |
| Lysine-specific demethylase-like domain | 894 |
| Vitamin K epoxide reductase | 894 |
| Vertebrate phospholipase A2 | 894 |
| DNA topoisomerase I- eukaryotic-type | 895 |
| DNA topoisomerase I- catalytic core- eukaryotic-type | 895 |
| Peptidase C1A- propeptide | 895 |
| Lipoxygenase- C-terminal | 895 |
| DNA topoisomerase I- DNA binding- eukaryotic-type | 895 |
| Peptidase C1A- papain C-terminal | 895 |
| Lipoxigenase | 896 |
| Peptidase C19- ubiquitin carboxyl-terminal hydrolase | 896 |
| Aldehyde oxidase/xanthine dehydrogenase- molybdopterin binding | 898 |
| Aldehyde oxidase/xanthine dehydrogenase- a/b hammerhead | 899 |
| Lactate/malate dehydrogenase- N-terminal | 899 |
| Lactate/malate dehydrogenase- C-terminal | 899 |
| DNA breaking-rejoining enzymes | 899 |
| GAF domain-like | 901 |
| Acetylcholinesterase-like | 901 |
| Acetylcholinesterase- tetramerisation domain | 902 |
| Tyrosine-protein kinase Tec- SH3 domain | 902 |
| Tyrosine-protein kinase TXK- SH3 domain | 902 |
| Tyrosine-protein kinase TXK- SH2 domain | 903 |
| POLO box domain | 903 |
| Pyridine nucleotide-disulphide oxidoreductase- dimerisation domain | 903 |
| Ionotropic glutamate receptor- L-glutamate and glycine-binding domain | 908 |
| Ionotropic glutamate receptor | 908 |
| Fibronectin type II module | 909 |
| 7-bladed beta-propeller | 909 |
| Fibronectin type II domain | 909 |
| PARP-10- RNA recognition motif 1 and 2 | 910 |
| PAN/Apple domain | 911 |
| PADR1 domain | 911 |
| Thyroglobulin type-1 domain | 911 |
| 2Fe-2S ferredoxin-type iron-sulfur binding domain | 911 |
| Thyroglobulin type-1 | 912 |
| 2Fe-2S ferredoxin-like | 912 |
| 2Fe-2S ferredoxin domains from multidomain proteins | 912 |
| FERM central domain | 914 |
| Pre-SET domain | 915 |
| Tensin-type phosphatase domain | 915 |
| Tensin phosphatase- C2 domain | 915 |
| Ntn hydrolase-like | 917 |
| Sushi/SCR/CCP domain | 918 |
| Stromal interaction molecule- Orai1-activating region | 919 |
| Ephrin type-B receptor 4- ligand binding domain | 920 |
| NFkappaB IPT domain | 921 |
| vWA-like | 922 |
| Small GTP-binding protein domain | 922 |
| Sialidase | 923 |
| Heat shock protein Hsp90- N-terminal | 924 |
| Heat shock protein 90- HSP90- N-terminal domain | 924 |
| N-terminal nucleophile aminohydrolases (Ntn hydrolases) | 924 |
| N-CoR- GPS2-interacting domain | 924 |
| Myb/SANT domain | 925 |
| Scavenger receptor cysteine-rich (SRCR) domain | 926 |
| Saposin B type domain | 926 |
| Bcr-Abl oncoprotein oligomerisation | 928 |
| Zinc finger- LIM-type | 928 |
| Zinc finger- FCS-type | 929 |
| BRCT domain | 929 |
| BCR-homology GTPase activation domain (BH-domain) | 930 |
| SRCR-like domain | 930 |
| SRCR-like | 931 |
| SRCR domain | 931 |
| Mannose-6-phosphate receptor binding protein 1 (Tip47)- C-terminal domain | 931 |
| Diacylglycerol/phorbol-ester binding | 932 |
| Peptidase M16- middle/third domain | 933 |
| Peptidase M16- N-terminal | 933 |
| Peptidase M16- C-terminal | 933 |
| DNA/RNA-binding 3-helical bundle | 934 |
| MAM domain | 935 |
| Glutathione S-transferase- N-terminal | 935 |
| Glutathione S-transferase- C-terminal-like | 936 |
| Glutathione S-transferase- C-terminal | 936 |
| Vertebrate heat shock transcription factor- C-terminal domain | 936 |
| Glutamate [NMDA] receptor- epsilon subunit- C-terminal | 936 |
| Lon- substrate-binding domain | 937 |
| Rubredoxin-like | 937 |
| Alpha/beta hydrolase fold-1 | 938 |
| Ribonucleotide reductase- class I - alpha subunit | 938 |
| Gamma-carboxyglutamic acid-rich (GLA) domain | 938 |
| Ribonucleotide reductase large subunit- N-terminal | 939 |
| Ubiquitin-associated domain | 939 |
| Ribonucleotide reductase large subunit- C-terminal | 939 |
| Lactate & malate dehydrogenases- C-terminal domain | 941 |
| PTP type protein phosphatase | 942 |
| PTK6- SH2 domain | 942 |
| LDH N-terminal domain-like | 942 |
| LDH C-terminal domain-like | 942 |
| GLA-domain | 943 |
| ATPase- AAA-type- core | 944 |
| PLC-like (P variant) | 945 |
| Tyrosine-protein kinase ITK- SH3 domain | 946 |
| Cysteine-rich domain | 946 |
| Four-helical up-and-down bundle | 946 |
| Cyclin-like | 946 |
| Cyclin- N-terminal | 947 |
| JAB1/MPN/MOV34 metalloenzyme domain | 948 |
| Cyclin- C-terminal domain | 948 |
| Tyrosinase copper-binding domain | 948 |
| Cyclin | 948 |
| Type II thymidine kinase | 948 |
| Type I phosphomannose isomerase | 949 |
| Tudor/PWWP/MBT | 949 |
| Transcription regulator Myc- N-terminal | 951 |
| 4-bladed beta-propeller | 951 |
| Transcription factor STAT-4 N-domain | 952 |
| PARP-14- RNA recognition motif 2 | 952 |
| Integrin domains | 952 |
| Ferric reductase- NAD binding domain | 952 |
| Protein Kinase B beta- catalytic domain | 952 |
| Integrin beta subunit- tail | 952 |
| Ferric reductase transmembrane component-like domain | 952 |
| Integrin beta subunit- cytoplasmic domain | 952 |
| Ferredoxin reductase-type FAD-binding domain | 953 |
| Integrin beta subunit- VWA domain | 953 |
| Integrin beta N-terminal | 953 |
| FYVE/PHD zinc finger | 953 |
| Integrin alpha-2 | 953 |
| FMN-linked oxidoreductases | 954 |
| Prolyl 4-hydroxylase- alpha subunit | 954 |
| Proliferating cell nuclear antigen- PCNA- N-terminal | 954 |
| Proliferating cell nuclear antigen- PCNA- C-terminal | 954 |
| Thioredoxin-like | 955 |
| FKBP-like | 955 |
| Thioredoxin fold | 955 |
| FKBP immunophilin/proline isomerase | 955 |
| FAD-binding 8 | 959 |
| Homeodomain-like | 959 |
| Sulfatase- N-terminal | 960 |
| HhH-GPD domain | 962 |
| Sodium/hydrogen exchanger- regulatory region | 962 |
| Smoothened- transmembrane domain | 963 |
| Phox homologous domain | 964 |
| Single transmembrane helix | 964 |
| Signal transducer and activation of transcription 1- TAZ2 binding domain- C-terminal | 965 |
| Serine/threonine-specific protein phosphatase/bis(5-nucleosyl)-tetraphosphatase | 965 |
| Phospholipase D/Transphosphatidylase | 966 |
| Phospholipase D-like domain | 966 |
| Phospholipase A2- PLA2 | 967 |
| Phospholipase A2 domain | 967 |
| EF-hand domain | 967 |
| Salt-Inducible kinase- catalytic domain | 968 |
| Motor proteins | 968 |
| Phosphoglycerate kinase | 968 |
| Beta-ketoacyl synthase- N-terminal | 968 |
| Beta-ketoacyl synthase- C-terminal | 969 |
| SWIRM domain | 969 |
| Mig-6 domain | 969 |
| STAT3- SH2 domain | 969 |
| Phosphatidylinositol 3-kinase regulatory subunit alpha- SH3 domain | 969 |
| STAT1- SH2 domain | 969 |
| Domain of unknown function DUF4927 | 970 |
| STAT-like | 970 |
| STAT transcription factor- protein interaction | 970 |
| STAT transcription factor- all-alpha domain | 970 |
| STAT transcription factor- DNA-binding | 971 |
| STAT DNA-binding domain | 971 |
| Domain of unknown function DUF1518 | 971 |
| STAT | 971 |
| Dipeptidylpeptidase IV- N-terminal domain | 973 |
| Glycoside hydrolase- family 85 | 973 |
| Dihydroorotate dehydrogenase domain | 973 |
| Peptidase S8/S53 domain | 973 |
| Peptidase S8- pro-domain | 973 |
| MPP-like | 974 |
| Peptidase S16- Lon proteolytic domain | 974 |
| Death domain | 975 |
| SARAH domain | 975 |
| Peptidase M13- N-terminal domain | 975 |
| Peptidase M13- C-terminal domain | 976 |
| S100/CaBP-9k-type- calcium binding- subdomain | 977 |
| S100 proteins | 978 |
| LuxS/MPP-like metallohydrolase | 978 |
| Glucose-6-phosphate dehydrogenase- NAD-binding | 978 |
| Glucose-6-phosphate dehydrogenase- C-terminal | 979 |
| Ulp1 protease family- C-terminal catalytic domain | 979 |
| Globin | 979 |
| RmlC-like cupins | 980 |
| Leucine-rich repeat N-terminal domain | 981 |
| Lesion bypass DNA polymerase (Y-family)- catalytic domain | 982 |
| PWWP domain | 982 |
| Alcohol dehydrogenase-like- C-terminal domain | 983 |
| Renin-like domain | 983 |
| Alcohol dehydrogenase- C-terminal | 983 |
| DNA (cytosine-5)-methyltransferase 1- replication foci domain | 983 |
| Acyl transferase | 983 |
| DMAP1-binding domain | 983 |
| DHS-like NAD/FAD-binding domain | 984 |
| Kinesin motor domain | 987 |
| PsbU/PolX domain-like | 988 |
| PI3K p85 subunit- inter-SH2 domain | 989 |
| PI3K p85 subunit- N-terminal SH2 domain | 989 |
| Cyclin- C-terminal domain 2 | 989 |
| PI3K p85 subunit- C-terminal SH2 domain | 989 |
| Concentrative nucleoside transporter N-terminal domain | 990 |
| Protein serine/threonine phosphatase | 990 |
| Concentrative nucleoside transporter C-terminal domain | 990 |
| Common fold of diphtheria toxin/transcription factors/cytochrome f | 991 |
| PDZ domain | 991 |
| First polo-box domain | 991 |
| Coagulation factor 5/8 C-terminal domain | 991 |
| Interferon/interleukin receptor domain | 992 |
| Protein kinase C- PB1 domain | 993 |
| Protein kinase B gamma- catalytic domain | 993 |
| Cholecystokinin A receptor- N-terminal | 994 |
| Cholecystokinin A receptor- N-domain | 994 |
| Thymidylate synthase/dCMP hydroxymethylase domain | 995 |
| P domain | 995 |
| Thymidylate synthase/dCMP hydroxymethylase | 996 |
| Oxoglutarate/iron-dependent dioxygenase | 996 |
| Cdc48 domain 2-like | 997 |
| OB-fold nucleic acid binding domain- AA-tRNA synthetase-type | 997 |
| FCP1 homology domain | 998 |
| Synaptojanin-2- RNA recognition motif | 1000 |
| Synaptojanin-1- RNA recognition motif | 1000 |
| Swapped Polo-box domain | 1001 |
| FAD dependent oxidoreductase | 1001 |
| Novel protein kinase C delta- catalytic domain | 1001 |
| Subtilisin-like | 1002 |
| Higher-molecular-weight phosphotyrosine protein phosphatases | 1003 |
| CSK-like- SH2 domain | 1003 |
| NUDIX hydrolase domain | 1003 |
| Pirin- N-terminal domain | 1005 |
| Small-conductance potassium channel | 1005 |
| Pirin- C-terminal domain | 1005 |
| CDC48- domain 2 | 1005 |
| Phosphotyrosine-binding domain (PTB) | 1006 |
| CDC48- N-terminal subdomain | 1006 |
| C5 cytosine-specific DNA methylase- DCM | 1007 |
| C2 domain-like | 1008 |
| EGF-like domain- extracellular | 1008 |
| Phospholipase C-beta- C-terminal domain | 1008 |
| C2 domain (Calcium/lipid-binding domain- CaLB) | 1008 |
| Phospholipase C- phosphatidylinositol-specific- Y domain | 1008 |
| EGF-like calcium-binding domain | 1008 |
| Phosphoinositide-specific phospholipase C- EF-hand-like domain | 1009 |
| Bromo adjacent homology (BAH) domain | 1010 |
| Phosphatidylinositol-specific phospholipase C- X domain | 1010 |
| Guanylate kinase/L-type calcium channel beta subunit | 1011 |
| Methionyl/Valyl/Leucyl/Isoleucyl-tRNA synthetase- anticodon-binding | 1012 |
| Periplasmic binding protein-like I | 1012 |
| BTB/POZ domain | 1012 |
| Domain of poly(ADP-ribose) polymerase | 1013 |
| Peptidase family A1 domain | 1014 |
| BAH domain | 1015 |
| MYND zinc finger | 1015 |
| MHC class II-associated invariant chain/CLIP- MHC II-interacting | 1016 |
| MHC class II-associated invariant chain- trimerisation | 1017 |
| Glyceraldehyde-3-phosphate dehydrogenase-like- N-terminal domain | 1017 |
| Peptidase M12B- propeptide | 1018 |
| Glyceraldehyde 3-phosphate dehydrogenase- catalytic domain | 1018 |
| Peptidase M12B- ADAM/reprolysin | 1018 |
| Glyceraldehyde 3-phosphate dehydrogenase- NAD(P) binding domain | 1018 |
| SAC domain | 1018 |
| Lysyl-tRNA synthetase- class II- C-terminal | 1018 |
| Peptidase M10A- matrix metallopeptidase- C-terminal | 1018 |
| S13-like H2TH domain | 1019 |
| Rudiment single hybrid motif | 1020 |
| Roc domain | 1021 |
| Pepsin-like | 1022 |
| Ribonuclease H-like motif | 1023 |
| Riboflavin synthase domain-like | 1023 |
| Papain-like | 1023 |
| Pancreatic lipase- N-terminal domain | 1023 |
| PYP-like sensor domain (PAS domain) | 1024 |
| PUL domain | 1024 |
| GPCR- family 2-like | 1024 |
| PTB/PI domain | 1025 |
| Reductase/isomerase/elongation factor common domain | 1026 |
| PRMT5- oligomerisation domain | 1026 |
| PRMT5- TIM barrel domain | 1026 |
| PRMT5 arginine-N-methyltransferase | 1027 |
| ATPase domain of HSP90 chaperone/DNA topoisomerase II/histidine kinase | 1027 |
| RNA recognition motif domain | 1027 |
| PLC-gamma- N-terminal SH2 domain | 1028 |
| PLC-gamma- C-terminal SH2 domain | 1028 |
| PurM-like- N-terminal domain | 1029 |
| Kexin/furin catalytic domain | 1029 |
| ARID-like | 1029 |
| PurM-like- C-terminal domain | 1029 |
| PLAA family ubiquitin binding- PFU | 1029 |
| ARID domain | 1029 |
| PurM N-terminal domain-like | 1029 |
| Cysteine proteinases | 1029 |
| ARID DNA-binding domain | 1030 |
| PurM C-terminal domain-like | 1030 |
| Proteinase K-like catalytic domain | 1030 |
| Isoleucyl tRNA synthetase type 2- anticodon-binding domain | 1031 |
| PDK1-type- PH domain | 1033 |
| PB1 domain | 1034 |
| PAS fold-3 | 1034 |
| Classical Protein Kinase C alpha- catalytic domain | 1034 |
| Classic zinc finger- C2H2 | 1034 |
| Citron homology (CNH) domain | 1035 |
| P-type trefoil domain | 1036 |
| Inositol polyphosphate-related phosphatase | 1037 |
| Inositol monophosphatase/fructose-1-6-bisphosphatase-like | 1038 |
| Cell cycle control phosphatase- catalytic domain | 1038 |
| PreATP-grasp domain | 1039 |
| FAD/NAD-linked reductases- dimerisation (C-terminal) domain | 1041 |
| Carnitine O-palmitoyltransferase- N-terminal | 1041 |
| FAD/NAD(P)-binding domain | 1041 |
| Hormone receptor domain | 1042 |
| Histone-lysine N-methyltransferase DOT1 domain | 1042 |
| Novel protein kinase C epsilon- catalytic domain | 1043 |
| Polo-box domain | 1043 |
| Plk4- second cryptic polo-box domain | 1044 |
| Plk4- first cryptic polo-box domain | 1044 |
| CULT domain | 1044 |
| Plk4- C-terminal polo-box domain | 1044 |
| CSN8/PSMD8/EIF3K | 1045 |
| NUDIX hydrolase | 1045 |
| Ephrin type-B receptor 2- ligand binding domain | 1046 |
| NF-kappa-B essential modulator NEMO- N-terminal | 1046 |
| Ephrin type-A receptor 1- ligand binding domain | 1046 |
| NF-kappa-B essential modulator NEMO- CC2-LZ domain | 1047 |
| NEMO- Zinc finger | 1047 |
| Phosphoribosylglycinamide synthetase- N-terminal | 1048 |
| Phosphoribosylglycinamide synthetase- C-domain | 1048 |
| Phosphoribosylglycinamide synthetase- ATP-grasp (A) domain | 1048 |
| NAD(P)-binding domain | 1048 |
| HR1 rho-binding domain | 1050 |
| Myelin transcription factor 1 | 1050 |
| HR1 repeat | 1050 |
| HIT/MYND zinc finger-like | 1051 |
| Mst1 SARAH domain | 1051 |
| HAD-superfamily hydrolase- subfamily IIID | 1052 |
| Domain of unknown function DUF1856 | 1054 |
| Metallo-dependent phosphatases | 1054 |
| Metal cation-transporting ATPase- ATP-binding domain N | 1055 |
| Meta-cation ATPase- catalytic domain P | 1055 |
| Glycosyl hydrolases family 2- sugar binding domain | 1056 |
| Glycoside hydrolase- family 2- immunoglobulin-like beta-sandwich | 1056 |
| Aurora kinase A | 1057 |
| Peptidase S8 propeptide/proteinase inhibitor I9 | 1057 |
| Glycoside hydrolase family 20- catalytic domain | 1057 |
| Glycoside hydrolase family 2- catalytic domain | 1057 |
| MBT repeat | 1058 |
| DNA/RNA polymerases | 1060 |
| Ankyrin repeat | 1060 |
| Lysophospholipase- catalytic domain | 1060 |
| Lipid transport protein- N-terminal | 1063 |
| DNA polymerase- Y-family- little finger domain | 1063 |
| Lipase/vitellogenin | 1063 |
| Lipase/lipooxygenase domain (PLAT/LH2 domain) | 1063 |
| Lipase- N-terminal | 1064 |
| Leucine zipper- Myc | 1065 |
| Laminin G domain | 1065 |
| GPCR- family 3- nine cysteines domain | 1066 |
| GPCR- family 2- extracellular hormone receptor domain | 1066 |
| LIM domain | 1067 |
| GPCR family 3- C-terminal | 1067 |
| GMP phosphodiesterase- delta subunit | 1067 |
| L-arabinose binding protein-like | 1068 |
| Cytochrome c oxidase- subunit II | 1068 |
| Cytochrome c oxidase subunit II-like- transmembrane region | 1068 |
| Cytochrome c oxidase subunit II-like C-terminal | 1068 |
| G proteins | 1068 |
| Cytochrome c oxidase subunit 2- C-terminal | 1069 |
| Cytochrome C oxidase subunit II- transmembrane domain | 1069 |
| Fungal lipase-like domain | 1069 |
| Fructose-1-6-bisphosphatase class I- N-terminal | 1070 |
| Cysteine-rich flanking region- C-terminal | 1070 |
| Focal adhesion kinase- targeting (FAT) domain | 1072 |
| 8-oxoguanine DNA glycosylase- N-terminal | 1075 |
| Integrin A (or I) domain | 1079 |
| 26S proteasome regulatory subunit- C-terminal | 1079 |
| Oxidoreductase FAD/NAD(P)-binding | 1079 |
| FKBP-type peptidyl-prolyl cis-trans isomerase domain | 1079 |
| Cdc42 binding domain-like | 1080 |
| "Peptidase/esterase gauge domain" | 1081 |
| Immunoglobulin V-set domain | 1081 |
| FAT domain of focal adhesion kinase | 1082 |
| I-kappa-kinase-beta NEMO binding domain | 1083 |
| Novel protein kinase C theta- catalytic domain | 1084 |
| Novel protein kinase C eta- catalytic domain | 1084 |
| Nitric oxide synthase- N-terminal | 1085 |
| Hint domain N-terminal | 1085 |
| Hint domain C-terminal | 1086 |
| COMT-like | 1087 |
| Ephrin type-A receptor 2- ligand binding domain | 1088 |
| CO dehydrogenase flavoprotein C-domain-like | 1088 |
| Helix-hairpin-helix DNA-binding motif- class 1 | 1088 |
| Hedgehog/intein (Hint) domain | 1088 |
| Hedgehog- N-terminal signalling domain | 1089 |
| Endonuclease/exonuclease/phosphatase | 1089 |
| Hedgehog protein- Hint domain | 1089 |
| Hedgehog C-terminal (Hog) autoprocessing domain | 1089 |
| Heat-shock transcription factor | 1090 |
| CACNB2- SH3 domain | 1090 |
| ERAP1-like C-terminal domain | 1091 |
| Heat shock factor (HSF)-type- DNA-binding | 1091 |
| HLH-like | 1092 |
| HLH- helix-loop-helix DNA-binding domain | 1092 |
| EF-hand | 1093 |
| HIF-1 alpha- transactivation domain- C-terminal | 1093 |
| EF Hand-like | 1093 |
| Dullard phosphatase domain- eukaryotic | 1093 |
| Middle domain of MutM-like DNA repair proteins | 1094 |
| Methylglyoxal synthase-like domain | 1095 |
| Methylglyoxal synthase-like | 1095 |
| Domain of unknown function DUF1713 | 1096 |
| BMX- SH2 domain | 1096 |
| Glycosyl-hydrolase family 116- catalytic region | 1097 |
| DnaJ domain | 1097 |
| Glycosyl-hydrolase family 116- N-terminal | 1097 |
| Glycoside hydrolase family 31- N-terminal domain | 1098 |
| Glycoside hydrolase family 18- catalytic domain | 1099 |
| Glycogen debranching enzyme- glucanotransferase domain | 1100 |
| Glycogen debranching enzyme- central domain | 1100 |
| Glycogen debranching enzyme- C-terminal | 1100 |
| Gastric H+/K+-transporter P-type ATPase- N-terminal | 1105 |
| Alpha-ketoglutarate-dependent dioxygenase FTO- catalytic domain | 1105 |
| Alpha-ketoglutarate-dependent dioxygenase FTO- C-terminal | 1105 |
| Galactose mutarotase- N-terminal barrel | 1106 |
| GRB2- N-terminal SH3 domain | 1106 |
| GRB2- C-terminal SH3 domain | 1107 |
| DNA clamp | 1107 |
| Frizzled/Smoothened- transmembrane domain | 1112 |
| Frizzled domain | 1112 |
| Cyclin-A- N-terminal | 1113 |
| Folate receptor-like | 1114 |
| Flavodoxin-like fold | 1115 |
| Fibronectin- type I | 1116 |
| Classical Protein Kinase C beta- catalytic domain | 1117 |
| Intercellular adhesion molecule/vascular cell adhesion molecule- N-terminal | 1117 |
| Intercellular adhesion molecule- N-terminal | 1118 |
| Intercellular adhesion molecule | 1118 |
| Fes/Fps/Fer- SH2 domain | 1118 |
| 35-cyclic nucleotide phosphodiesterase N-terminal | 1119 |
| 3-oxo-5-alpha-steroid 4-dehydrogenase- C-terminal | 1119 |
| Family 1 of glycosyl hydrolase | 1119 |
| Checkpoint kinase 1- catalytic domain | 1120 |
| Chaperone J-domain | 1121 |
| Inosicase | 1121 |
| Cdk-activating kinase assembly factor MAT1- centre | 1121 |
| (Phosphotyrosine protein) phosphatases II | 1122 |
| FCH domain | 1123 |
| Casein kinase II beta subunit | 1124 |
| Carbohydrate phosphatase | 1125 |
| Calcineurin-like phosphoesterase domain- ApaH type | 1126 |
| F-BAR domain | 1126 |
| CXC chemokine receptor 4 N-terminal domain | 1127 |
| Eukaryotic glycogen debranching enzyme- N-terminal domain | 1127 |
| Hexokinase- N-terminal | 1128 |
| Hexokinase- C-terminal | 1129 |
| Hepsin- SRCR domain | 1129 |
| CCHHC domain | 1131 |
| EF-hand modules in multidomain proteins | 1134 |
| Dual specificity phosphatase- catalytic domain | 1135 |
| Beta-hexosaminidase- eukaryotic type- N-terminal | 1136 |
| Double-stranded beta-helix | 1136 |
| Disintegrin domain | 1139 |
| Glutathione synthetase ATP-binding domain-like | 1143 |
| Aminoacyl-tRNA synthetase- class Ia | 1143 |
| DNA-directed DNA polymerase X | 1143 |
| Aminoacyl-tRNA synthetase- class II (D/K/N) | 1144 |
| Aminoacyl-tRNA synthetase- class II | 1144 |
| Amidase signature domain | 1145 |
| DNA polymerase lambda- fingers domain | 1146 |
| DNA polymerase beta-like- N-terminal domain | 1146 |
| DNA polymerase beta- thumb domain | 1147 |
| DNA polymerase beta- palm domain | 1147 |
| DNA polymerase beta- N-terminal domain-like | 1147 |
| Aldehyde dehydrogenase domain | 1149 |
| ATP-cone domain | 1153 |
| Formyltransferase | 1154 |
| Formyl transferase- N-terminal | 1155 |
| Formamidopyrimidine-DNA glycosylase- catalytic domain | 1155 |
| ALDH-like | 1155 |
| ADD domain | 1156 |
| Flavoproteins | 1156 |
| Flavoprotein pyridine nucleotide cytochrome reductase | 1156 |
| Flavodoxin/nitric oxide synthase | 1157 |
| Flavodoxin-like | 1157 |
| Colipase-binding domain | 1158 |
| Cleavage/polyadenylation specificity factor- A subunit- C-terminal | 1158 |
| 35-cyclic nucleotide phosphodiesterase PDE8 | 1160 |
| Choloylglycine hydrolase/NAAA C-terminal | 1160 |
| Chitinase II | 1161 |
| Chitin binding domain | 1162 |
| 14-3-3 protein | 1163 |
| 14-3-3 domain | 1163 |
| Cation/H+ exchanger | 1164 |
| Cation-transporting P-type ATPase- N-terminal | 1164 |
| Cation-transporting P-type ATPase- C-terminal | 1165 |
| Cathepsin propeptide inhibitor domain (I29) | 1165 |
| FAD-binding- type 1 | 1167 |
| Calbindin D9K | 1168 |
| CD80-like- immunoglobulin C2-set | 1172 |
| Endonuclease VIII-like 1- DNA binding | 1173 |
| Endonuclease III | 1173 |
| EYA domain | 1173 |
| EXPERA domain | 1174 |
| Domain of unknown function DUF1866 | 1178 |
| Atypical Protein Kinase C zeta- catalytic domain | 1182 |
| Deoxynucleoside kinase domain | 1182 |
| Aspartic peptidase- N-terminal | 1183 |
| Arylsulfatase | 1183 |
| Apple domain | 1183 |
| Anthrax toxin receptor- extracellular | 1184 |
| DNase I-like | 1184 |
| Anthrax toxin receptor- C-terminal | 1184 |
| DNA-glycosylase | 1185 |
| Alpha/beta hydrolase fold-3 | 1187 |
| Alkaline phosphatase-like | 1189 |
| DNA glycosylase/AP lyase- H2TH DNA-binding | 1190 |
| Acid proteases | 1192 |
| Cytochrome p450 reductase N-terminal domain-like | 1192 |
| Acid ceramidase- N-terminal | 1192 |
| ATP1G1/PLM/MAT8-like (FXYD-like) | 1194 |
| Cytidine deaminase-like | 1195 |
| Cytidine and deoxycytidylate deaminase domain | 1195 |
| ADAM17- membrane-proximal domain | 1198 |
| ADAM10/ADAM17 catalytic domain | 1198 |
| 4-helical cytokines | 1201 |
| 1-phosphatidylinositol 4-5-bisphosphate phosphodiesterase gamma-1- SH3 domain | 1205 |
| (Trans)glycosidases | 1205 |
| "Winged helix" DNA-binding domain | 1206 |
| Calmodulin-binding domain | 1209 |
| Calcium/calmodulin-dependent protein kinase II- association-domain | 1209 |
| Barrel-sandwich hybrid | 1219 |
| Bacillus chorismate mutase-like | 1220 |
| BC N-terminal domain-like | 1222 |
| BC C-terminal domain-like | 1222 |
| BC ATP-binding domain-like | 1222 |
| Atypical protein kinase C iota type- catalytic domain | 1224 |
| Amidohydrolase-related | 1228 |
| Actin-like ATPase domain | 1233 |
| ATP-grasp fold | 1236 |
| ATP-grasp | 1236 |
| APOBEC-like- N-terminal | 1238 |

**Supplementary Table 4. Drugs currently in clinical trials ranked by the number of times the predictor assigned them withdrawal status.** The least likely to be withdrawn have rank 0 and the most likely to be withdrawn have rank 10.

| Number of times withdrawal predicted | Drug |
| --- | --- |
| 0 | CHEMBL269277 |
| 0 | CHEMBL7492 |
| 0 | CHEMBL274323 |
| 0 | CHEMBL11298 |
| 0 | CHEMBL273453 |
| 0 | CHEMBL13960 |
| 0 | CHEMBL14021 |
| 0 | CHEMBL557 |
| 0 | CHEMBL279785 |
| 0 | CHEMBL214332 |
| 0 | CHEMBL278315 |
| 0 | CHEMBL21536 |
| 0 | CHEMBL281398 |
| 0 | CHEMBL25336 |
| 0 | CHEMBL23293 |
| 0 | CHEMBL27769 |
| 0 | CHEMBL757 |
| 0 | CHEMBL285123 |
| 0 | CHEMBL38434 |
| 0 | CHEMBL438945 |
| 0 | CHEMBL46618 |
| 0 | CHEMBL296468 |
| 0 | CHEMBL295698 |
| 0 | CHEMBL431733 |
| 0 | CHEMBL417016 |
| 0 | CHEMBL301742 |
| 0 | CHEMBL68055 |
| 0 | CHEMBL304383 |
| 0 | CHEMBL304087 |
| 0 | CHEMBL75133 |
| 0 | CHEMBL74355 |
| 0 | CHEMBL406291 |
| 0 | CHEMBL82202 |
| 0 | CHEMBL313006 |
| 0 | CHEMBL419667 |
| 0 | CHEMBL329123 |
| 0 | CHEMBL91397 |
| 0 | CHEMBL94657 |
| 0 | CHEMBL95606 |
| 0 | CHEMBL105060 |
| 0 | CHEMBL110739 |
| 0 | CHEMBL109480 |
| 0 | CHEMBL325424 |
| 0 | CHEMBL118841 |
| 0 | CHEMBL126159 |
| 0 | CHEMBL334830 |
| 0 | CHEMBL134561 |
| 0 | CHEMBL424278 |
| 0 | CHEMBL262747 |
| 0 | CHEMBL182066 |
| 0 | CHEMBL186141 |
| 0 | CHEMBL186113 |
| 0 | CHEMBL184618 |
| 0 | CHEMBL408350 |
| 0 | CHEMBL372764 |
| 0 | CHEMBL197672 |
| 0 | CHEMBL383824 |
| 0 | CHEMBL219410 |
| 0 | CHEMBL203665 |
| 0 | CHEMBL206834 |
| 0 | CHEMBL463763 |
| 0 | CHEMBL206031 |
| 0 | CHEMBL207197 |
| 0 | CHEMBL441687 |
| 0 | CHEMBL168640 |
| 0 | CHEMBL212432 |
| 0 | CHEMBL377559 |
| 0 | CHEMBL436774 |
| 0 | CHEMBL219046 |
| 0 | CHEMBL220808 |
| 0 | CHEMBL218166 |
| 0 | CHEMBL376756 |
| 0 | CHEMBL376180 |
| 0 | CHEMBL229430 |
| 0 | CHEMBL230006 |
| 0 | CHEMBL232943 |
| 0 | CHEMBL267225 |
| 0 | CHEMBL235363 |
| 0 | CHEMBL236593 |
| 0 | CHEMBL398110 |
| 0 | CHEMBL241694 |
| 0 | CHEMBL240624 |
| 0 | CHEMBL398338 |
| 0 | CHEMBL429844 |
| 0 | CHEMBL406050 |
| 0 | CHEMBL437027 |
| 0 | CHEMBL411070 |
| 0 | CHEMBL412272 |
| 0 | CHEMBL408701 |
| 0 | CHEMBL486208 |
| 0 | CHEMBL1586 |
| 0 | CHEMBL517140 |
| 0 | CHEMBL490672 |
| 0 | CHEMBL506981 |
| 0 | CHEMBL522302 |
| 0 | CHEMBL522987 |
| 0 | CHEMBL502620 |
| 0 | CHEMBL494089 |
| 0 | CHEMBL459505 |
| 0 | CHEMBL492399 |
| 0 | CHEMBL500468 |
| 0 | CHEMBL478858 |
| 0 | CHEMBL513909 |
| 0 | CHEMBL505147 |
| 0 | CHEMBL514201 |
| 0 | CHEMBL508583 |
| 0 | CHEMBL518924 |
| 0 | CHEMBL498672 |
| 0 | CHEMBL463981 |
| 0 | CHEMBL479527 |
| 0 | CHEMBL482967 |
| 0 | CHEMBL538867 |
| 0 | CHEMBL562318 |
| 0 | CHEMBL564829 |
| 0 | CHEMBL541758 |
| 0 | CHEMBL550961 |
| 0 | CHEMBL571948 |
| 0 | CHEMBL570015 |
| 0 | CHEMBL567303 |
| 0 | CHEMBL595573 |
| 0 | CHEMBL592445 |
| 0 | CHEMBL597800 |
| 0 | CHEMBL603469 |
| 0 | CHEMBL591501 |
| 0 | CHEMBL591118 |
| 0 | CHEMBL602070 |
| 0 | CHEMBL1079593 |
| 0 | CHEMBL1090771 |
| 0 | CHEMBL1088750 |
| 0 | CHEMBL1093059 |
| 0 | CHEMBL1090479 |
| 0 | CHEMBL1096896 |
| 0 | CHEMBL1097999 |
| 0 | CHEMBL1085699 |
| 0 | CHEMBL1083390 |
| 0 | CHEMBL1084546 |
| 0 | CHEMBL1086218 |
| 0 | CHEMBL1084617 |
| 0 | CHEMBL1082462 |
| 0 | CHEMBL1162175 |
| 0 | CHEMBL1195136 |
| 0 | CHEMBL1198855 |
| 0 | CHEMBL1213327 |
| 0 | CHEMBL1213583 |
| 0 | CHEMBL1215923 |
| 0 | CHEMBL1233058 |
| 0 | CHEMBL1233528 |
| 0 | CHEMBL1234354 |
| 0 | CHEMBL1236107 |
| 0 | CHEMBL1236475 |
| 0 | CHEMBL1236962 |
| 0 | CHEMBL1237212 |
| 0 | CHEMBL1241855 |
| 0 | CHEMBL1277072 |
| 0 | CHEMBL1278146 |
| 0 | CHEMBL1568698 |
| 0 | CHEMBL1615025 |
| 0 | CHEMBL1684950 |
| 0 | CHEMBL1738757 |
| 0 | CHEMBL1738758 |
| 0 | CHEMBL1738889 |
| 0 | CHEMBL1761322 |
| 0 | CHEMBL1770916 |
| 0 | CHEMBL1823872 |
| 0 | CHEMBL1835919 |
| 0 | CHEMBL1852164 |
| 0 | CHEMBL1908397 |
| 0 | CHEMBL1909452 |
| 0 | CHEMBL1910936 |
| 0 | CHEMBL1911882 |
| 0 | CHEMBL1915540 |
| 0 | CHEMBL1922660 |
| 0 | CHEMBL1923502 |
| 0 | CHEMBL1928262 |
| 0 | CHEMBL1929396 |
| 0 | CHEMBL1938870 |
| 0 | CHEMBL1951143 |
| 0 | CHEMBL1969664 |
| 0 | CHEMBL2017179 |
| 0 | CHEMBL2017974 |
| 0 | CHEMBL2022968 |
| 0 | CHEMBL2035460 |
| 0 | CHEMBL2037511 |
| 0 | CHEMBL2051955 |
| 0 | CHEMBL2057301 |
| 0 | CHEMBL2063869 |
| 0 | CHEMBL2074689 |
| 0 | CHEMBL2087361 |
| 0 | CHEMBL2093999 |
| 0 | CHEMBL2103840 |
| 0 | CHEMBL2103842 |
| 0 | CHEMBL2103847 |
| 0 | CHEMBL2103884 |
| 0 | CHEMBL2105661 |
| 0 | CHEMBL2105728 |
| 0 | CHEMBL2105734 |
| 0 | CHEMBL2107358 |
| 0 | CHEMBL2107455 |
| 0 | CHEMBL2107786 |
| 0 | CHEMBL2107822 |
| 0 | CHEMBL2107832 |
| 0 | CHEMBL2110727 |
| 0 | CHEMBL2133806 |
| 0 | CHEMBL2140408 |
| 0 | CHEMBL2142592 |
| 0 | CHEMBL2147777 |
| 0 | CHEMBL2158051 |
| 0 | CHEMBL2158685 |
| 0 | CHEMBL2178578 |
| 0 | CHEMBL2180602 |
| 0 | CHEMBL2180604 |
| 0 | CHEMBL2181753 |
| 0 | CHEMBL2204263 |
| 0 | CHEMBL2219422 |
| 0 | CHEMBL2263632 |
| 0 | CHEMBL2316582 |
| 0 | CHEMBL2326966 |
| 0 | CHEMBL2338801 |
| 0 | CHEMBL2346738 |
| 0 | CHEMBL2346976 |
| 0 | CHEMBL2347655 |
| 0 | CHEMBL2364614 |
| 0 | CHEMBL2364624 |
| 0 | CHEMBL2386889 |
| 0 | CHEMBL2391146 |
| 0 | CHEMBL2392545 |
| 0 | CHEMBL2397450 |
| 0 | CHEMBL2431768 |
| 0 | CHEMBL3039498 |
| 0 | CHEMBL3039522 |
| 0 | CHEMBL3087515 |
| 0 | CHEMBL3092562 |
| 0 | CHEMBL3109802 |
| 0 | CHEMBL3113734 |
| 0 | CHEMBL3113974 |
| 0 | CHEMBL3115681 |
| 0 | CHEMBL3133037 |
| 0 | CHEMBL3137304 |
| 0 | CHEMBL3137308 |
| 0 | CHEMBL3188386 |
| 0 | CHEMBL3215298 |
| 0 | CHEMBL3218578 |
| 0 | CHEMBL3287218 |
| 0 | CHEMBL3287735 |
| 0 | CHEMBL3301601 |
| 0 | CHEMBL3301606 |
| 0 | CHEMBL3319236 |
| 0 | CHEMBL3334567 |
| 0 | CHEMBL3334624 |
| 0 | CHEMBL3334824 |
| 0 | CHEMBL3337527 |
| 0 | CHEMBL3353541 |
| 0 | CHEMBL3356433 |
| 0 | CHEMBL3358920 |
| 0 | CHEMBL3359265 |
| 0 | CHEMBL3407547 |
| 0 | CHEMBL3414626 |
| 0 | CHEMBL3416885 |
| 0 | CHEMBL3426621 |
| 0 | CHEMBL3544932 |
| 0 | CHEMBL3545036 |
| 0 | CHEMBL3545043 |
| 0 | CHEMBL3545076 |
| 0 | CHEMBL3545083 |
| 0 | CHEMBL3545154 |
| 0 | CHEMBL3545233 |
| 0 | CHEMBL3545350 |
| 0 | CHEMBL3545365 |
| 0 | CHEMBL3545414 |
| 0 | CHEMBL3577885 |
| 0 | CHEMBL3617964 |
| 0 | CHEMBL3622820 |
| 0 | CHEMBL3623290 |
| 0 | CHEMBL3633802 |
| 0 | CHEMBL3643413 |
| 0 | CHEMBL3659477 |
| 0 | CHEMBL3669417 |
| 0 | CHEMBL3673452 |
| 0 | CHEMBL3674570 |
| 0 | CHEMBL3639788 |
| 0 | CHEMBL3682589 |
| 0 | CHEMBL3701238 |
| 0 | CHEMBL3702854 |
| 0 | CHEMBL3707409 |
| 0 | CHEMBL3716057 |
| 0 | CHEMBL3716552 |
| 0 | CHEMBL3716365 |
| 0 | CHEMBL3809901 |
| 0 | CHEMBL3818875 |
| 0 | CHEMBL3894518 |
| 0 | CHEMBL3899477 |
| 0 | CHEMBL3900409 |
| 0 | CHEMBL3911164 |
| 0 | CHEMBL3916717 |
| 0 | CHEMBL3916929 |
| 0 | CHEMBL3920982 |
| 0 | CHEMBL3930624 |
| 0 | CHEMBL3931971 |
| 0 | CHEMBL3963485 |
| 0 | CHEMBL3967849 |
| 0 | CHEMBL3969876 |
| 0 | CHEMBL3982690 |
| 0 | CHEMBL3982723 |
| 0 | CHEMBL3989904 |
| 0 | CHEMBL3989927 |
| 0 | CHEMBL3989941 |
| 0 | CHEMBL3989967 |
| 0 | CHEMBL3990145 |
| 0 | CHEMBL3991932 |
| 0 | CHEMBL4059888 |
| 0 | CHEMBL4068509 |
| 0 | CHEMBL4073443 |
| 0 | CHEMBL4076837 |
| 0 | CHEMBL4078588 |
| 0 | CHEMBL4080062 |
| 0 | CHEMBL4086816 |
| 0 | CHEMBL4098253 |
| 0 | CHEMBL4110551 |
| 0 | CHEMBL4113131 |
| 0 | CHEMBL4116008 |
| 0 | CHEMBL4167360 |
| 0 | CHEMBL4173974 |
| 0 | CHEMBL4175981 |
| 0 | CHEMBL4205422 |
| 0 | CHEMBL4206033 |
| 0 | CHEMBL4218271 |
| 0 | CHEMBL4225088 |
| 0 | CHEMBL4228124 |
| 0 | CHEMBL4228250 |
| 0 | CHEMBL4250860 |
| 0 | CHEMBL4279047 |
| 0 | CHEMBL4297183 |
| 0 | CHEMBL4297305 |
| 0 | CHEMBL4297422 |
| 0 | CHEMBL4297468 |
| 0 | CHEMBL4297527 |
| 0 | CHEMBL4297610 |
| 0 | CHEMBL4297625 |
| 0 | CHEMBL4297635 |
| 0 | CHEMBL4297640 |
| 0 | CHEMBL4297666 |
| 0 | CHEMBL4298138 |
| 0 | CHEMBL4303241 |
| 0 | CHEMBL4439321 |
| 0 | CHEMBL4446378 |
| 0 | CHEMBL4457723 |
| 0 | CHEMBL4462530 |
| 0 | CHEMBL4466233 |
| 0 | CHEMBL4526356 |
| 0 | CHEMBL4577523 |
| 0 | CHEMBL4578881 |
| 0 | CHEMBL4594350 |
| 0 | CHEMBL4594432 |
| 0 | CHEMBL4634542 |
| 0 | CHEMBL4647810 |
| 0 | CHEMBL4648616 |
| 0 | CHEMBL4650316 |
| 0 | CHEMBL4650323 |
| 0 | CHEMBL4650365 |
| 1 | CHEMBL22055 |
| 1 | CHEMBL25202 |
| 1 | CHEMBL284092 |
| 1 | CHEMBL437472 |
| 1 | CHEMBL39541 |
| 1 | CHEMBL301829 |
| 1 | CHEMBL52609 |
| 1 | CHEMBL55214 |
| 1 | CHEMBL61780 |
| 1 | CHEMBL76222 |
| 1 | CHEMBL77517 |
| 1 | CHEMBL82301 |
| 1 | CHEMBL311300 |
| 1 | CHEMBL85398 |
| 1 | CHEMBL83626 |
| 1 | CHEMBL109648 |
| 1 | CHEMBL113313 |
| 1 | CHEMBL169 |
| 1 | CHEMBL122270 |
| 1 | CHEMBL146032 |
| 1 | CHEMBL149082 |
| 1 | CHEMBL150894 |
| 1 | CHEMBL348475 |
| 1 | CHEMBL355200 |
| 1 | CHEMBL178654 |
| 1 | CHEMBL359965 |
| 1 | CHEMBL371405 |
| 1 | CHEMBL200102 |
| 1 | CHEMBL203567 |
| 1 | CHEMBL218291 |
| 1 | CHEMBL219568 |
| 1 | CHEMBL226267 |
| 1 | CHEMBL392158 |
| 1 | CHEMBL260046 |
| 1 | CHEMBL267431 |
| 1 | CHEMBL261244 |
| 1 | CHEMBL270362 |
| 1 | CHEMBL473659 |
| 1 | CHEMBL469449 |
| 1 | CHEMBL507974 |
| 1 | CHEMBL511115 |
| 1 | CHEMBL452076 |
| 1 | CHEMBL455136 |
| 1 | CHEMBL454138 |
| 1 | CHEMBL491473 |
| 1 | CHEMBL521851 |
| 1 | CHEMBL467888 |
| 1 | CHEMBL496748 |
| 1 | CHEMBL456029 |
| 1 | CHEMBL485629 |
| 1 | CHEMBL501259 |
| 1 | CHEMBL517427 |
| 1 | CHEMBL447955 |
| 1 | CHEMBL497939 |
| 1 | CHEMBL1079175 |
| 1 | CHEMBL1197564 |
| 1 | CHEMBL1207607 |
| 1 | CHEMBL1230609 |
| 1 | CHEMBL1276678 |
| 1 | CHEMBL1628688 |
| 1 | CHEMBL1630578 |
| 1 | CHEMBL1645462 |
| 1 | CHEMBL1684984 |
| 1 | CHEMBL1688243 |
| 1 | CHEMBL1762621 |
| 1 | CHEMBL1800955 |
| 1 | CHEMBL1908394 |
| 1 | CHEMBL1938400 |
| 1 | CHEMBL1956285 |
| 1 | CHEMBL2010872 |
| 1 | CHEMBL2041933 |
| 1 | CHEMBL2068971 |
| 1 | CHEMBL2105705 |
| 1 | CHEMBL2105738 |
| 1 | CHEMBL2105762 |
| 1 | CHEMBL2179105 |
| 1 | CHEMBL2333941 |
| 1 | CHEMBL2364611 |
| 1 | CHEMBL2381408 |
| 1 | CHEMBL2386346 |
| 1 | CHEMBL2396989 |
| 1 | CHEMBL2397415 |
| 1 | CHEMBL2402737 |
| 1 | CHEMBL2408045 |
| 1 | CHEMBL3039525 |
| 1 | CHEMBL3125702 |
| 1 | CHEMBL3126832 |
| 1 | CHEMBL3137316 |
| 1 | CHEMBL3287255 |
| 1 | CHEMBL3314565 |
| 1 | CHEMBL3330226 |
| 1 | CHEMBL3427435 |
| 1 | CHEMBL3527000 |
| 1 | CHEMBL3545085 |
| 1 | CHEMBL3545108 |
| 1 | CHEMBL3545413 |
| 1 | CHEMBL3623004 |
| 1 | CHEMBL3644587 |
| 1 | CHEMBL3653256 |
| 1 | CHEMBL3666807 |
| 1 | CHEMBL3668014 |
| 1 | CHEMBL3678958 |
| 1 | CHEMBL3707347 |
| 1 | CHEMBL3746329 |
| 1 | CHEMBL3809489 |
| 1 | CHEMBL3828074 |
| 1 | CHEMBL3904602 |
| 1 | CHEMBL3950712 |
| 1 | CHEMBL3977543 |
| 1 | CHEMBL3989926 |
| 1 | CHEMBL3989948 |
| 1 | CHEMBL3989951 |
| 1 | CHEMBL4065122 |
| 1 | CHEMBL4078100 |
| 1 | CHEMBL4079239 |
| 1 | CHEMBL4091801 |
| 1 | CHEMBL4105630 |
| 1 | CHEMBL4204869 |
| 1 | CHEMBL4206492 |
| 1 | CHEMBL4209157 |
| 1 | CHEMBL4217292 |
| 1 | CHEMBL4285417 |
| 1 | CHEMBL4292264 |
| 1 | CHEMBL4297287 |
| 1 | CHEMBL4297488 |
| 1 | CHEMBL4297604 |
| 1 | CHEMBL4297615 |
| 1 | CHEMBL4297627 |
| 1 | CHEMBL4297648 |
| 1 | CHEMBL4435170 |
| 1 | CHEMBL4558324 |
| 1 | CHEMBL4567446 |
| 1 | CHEMBL4594280 |
| 1 | CHEMBL4594423 |
| 1 | CHEMBL4594429 |
| 1 | CHEMBL4594448 |
| 2 | CHEMBL204021 |
| 2 | CHEMBL274070 |
| 2 | CHEMBL273862 |
| 2 | CHEMBL12948 |
| 2 | CHEMBL13817 |
| 2 | CHEMBL17423 |
| 2 | CHEMBL31965 |
| 2 | CHEMBL284616 |
| 2 | CHEMBL54661 |
| 2 | CHEMBL305660 |
| 2 | CHEMBL1016 |
| 2 | CHEMBL307429 |
| 2 | CHEMBL321582 |
| 2 | CHEMBL105442 |
| 2 | CHEMBL124660 |
| 2 | CHEMBL191413 |
| 2 | CHEMBL372205 |
| 2 | CHEMBL197669 |
| 2 | CHEMBL206815 |
| 2 | CHEMBL214268 |
| 2 | CHEMBL415049 |
| 2 | CHEMBL240163 |
| 2 | CHEMBL1516 |
| 2 | CHEMBL429876 |
| 2 | CHEMBL271220 |
| 2 | CHEMBL411907 |
| 2 | CHEMBL515387 |
| 2 | CHEMBL446785 |
| 2 | CHEMBL476323 |
| 2 | CHEMBL476960 |
| 2 | CHEMBL506871 |
| 2 | CHEMBL445472 |
| 2 | CHEMBL483321 |
| 2 | CHEMBL536971 |
| 2 | CHEMBL561371 |
| 2 | CHEMBL551064 |
| 2 | CHEMBL572881 |
| 2 | CHEMBL574738 |
| 2 | CHEMBL558752 |
| 2 | CHEMBL575060 |
| 2 | CHEMBL598797 |
| 2 | CHEMBL607707 |
| 2 | CHEMBL1214827 |
| 2 | CHEMBL1230065 |
| 2 | CHEMBL1230165 |
| 2 | CHEMBL1231124 |
| 2 | CHEMBL1231160 |
| 2 | CHEMBL1255901 |
| 2 | CHEMBL1614725 |
| 2 | CHEMBL1779046 |
| 2 | CHEMBL1779710 |
| 2 | CHEMBL1921976 |
| 2 | CHEMBL1944698 |
| 2 | CHEMBL1946618 |
| 2 | CHEMBL1952329 |
| 2 | CHEMBL1976040 |
| 2 | CHEMBL2013174 |
| 2 | CHEMBL2031465 |
| 2 | CHEMBL2079588 |
| 2 | CHEMBL2103856 |
| 2 | CHEMBL2105686 |
| 2 | CHEMBL2105699 |
| 2 | CHEMBL2105709 |
| 2 | CHEMBL2177390 |
| 2 | CHEMBL2386558 |
| 2 | CHEMBL2419346 |
| 2 | CHEMBL3039517 |
| 2 | CHEMBL3137331 |
| 2 | CHEMBL3188551 |
| 2 | CHEMBL3219616 |
| 2 | CHEMBL3287379 |
| 2 | CHEMBL3317856 |
| 2 | CHEMBL3358954 |
| 2 | CHEMBL3544911 |
| 2 | CHEMBL3545215 |
| 2 | CHEMBL3545308 |
| 2 | CHEMBL3586404 |
| 2 | CHEMBL3590106 |
| 2 | CHEMBL3601398 |
| 2 | CHEMBL3681949 |
| 2 | CHEMBL3686884 |
| 2 | CHEMBL3905910 |
| 2 | CHEMBL3945728 |
| 2 | CHEMBL3975308 |
| 2 | CHEMBL3984425 |
| 2 | CHEMBL3989934 |
| 2 | CHEMBL3989970 |
| 2 | CHEMBL4060569 |
| 2 | CHEMBL4071161 |
| 2 | CHEMBL4071864 |
| 2 | CHEMBL4094440 |
| 2 | CHEMBL4112930 |
| 2 | CHEMBL4227505 |
| 2 | CHEMBL4279521 |
| 2 | CHEMBL4296719 |
| 2 | CHEMBL4297507 |
| 2 | CHEMBL4297584 |
| 2 | CHEMBL4297609 |
| 2 | CHEMBL4303404 |
| 2 | CHEMBL4303782 |
| 2 | CHEMBL4459585 |
| 2 | CHEMBL4471306 |
| 2 | CHEMBL4583691 |
| 2 | CHEMBL4594298 |
| 2 | CHEMBL4594348 |
| 2 | CHEMBL4594419 |
| 2 | CHEMBL4650521 |
| 3 | CHEMBL7568 |
| 3 | CHEMBL8659 |
| 3 | CHEMBL484 |
| 3 | CHEMBL10316 |
| 3 | CHEMBL491 |
| 3 | CHEMBL12318 |
| 3 | CHEMBL96 |
| 3 | CHEMBL274654 |
| 3 | CHEMBL14935 |
| 3 | CHEMBL281594 |
| 3 | CHEMBL265502 |
| 3 | CHEMBL282686 |
| 3 | CHEMBL29292 |
| 3 | CHEMBL431701 |
| 3 | CHEMBL34412 |
| 3 | CHEMBL38380 |
| 3 | CHEMBL34124 |
| 3 | CHEMBL816 |
| 3 | CHEMBL38943 |
| 3 | CHEMBL413376 |
| 3 | CHEMBL44426 |
| 3 | CHEMBL858 |
| 3 | CHEMBL49429 |
| 3 | CHEMBL59356 |
| 3 | CHEMBL62381 |
| 3 | CHEMBL67279 |
| 3 | CHEMBL1062 |
| 3 | CHEMBL112797 |
| 3 | CHEMBL338604 |
| 3 | CHEMBL435224 |
| 3 | CHEMBL148674 |
| 3 | CHEMBL351706 |
| 3 | CHEMBL169896 |
| 3 | CHEMBL361812 |
| 3 | CHEMBL362558 |
| 3 | CHEMBL190333 |
| 3 | CHEMBL383322 |
| 3 | CHEMBL206468 |
| 3 | CHEMBL207433 |
| 3 | CHEMBL217092 |
| 3 | CHEMBL220050 |
| 3 | CHEMBL226335 |
| 3 | CHEMBL392149 |
| 3 | CHEMBL427683 |
| 3 | CHEMBL250450 |
| 3 | CHEMBL253978 |
| 3 | CHEMBL253969 |
| 3 | CHEMBL259084 |
| 3 | CHEMBL408194 |
| 3 | CHEMBL1543 |
| 3 | CHEMBL572878 |
| 3 | CHEMBL429736 |
| 3 | CHEMBL270515 |
| 3 | CHEMBL403989 |
| 3 | CHEMBL449317 |
| 3 | CHEMBL520733 |
| 3 | CHEMBL1575 |
| 3 | CHEMBL460702 |
| 3 | CHEMBL513994 |
| 3 | CHEMBL481611 |
| 3 | CHEMBL444478 |
| 3 | CHEMBL496102 |
| 3 | CHEMBL495727 |
| 3 | CHEMBL522892 |
| 3 | CHEMBL467399 |
| 3 | CHEMBL443684 |
| 3 | CHEMBL561057 |
| 3 | CHEMBL553204 |
| 3 | CHEMBL591429 |
| 3 | CHEMBL576982 |
| 3 | CHEMBL578211 |
| 3 | CHEMBL609583 |
| 3 | CHEMBL1078178 |
| 3 | CHEMBL1095032 |
| 3 | CHEMBL1162144 |
| 3 | CHEMBL1208829 |
| 3 | CHEMBL1240967 |
| 3 | CHEMBL1241348 |
| 3 | CHEMBL1256686 |
| 3 | CHEMBL1269597 |
| 3 | CHEMBL1614710 |
| 3 | CHEMBL1631540 |
| 3 | CHEMBL1650443 |
| 3 | CHEMBL1650595 |
| 3 | CHEMBL1668019 |
| 3 | CHEMBL1823817 |
| 3 | CHEMBL1829433 |
| 3 | CHEMBL1922094 |
| 3 | CHEMBL1922235 |
| 3 | CHEMBL1951575 |
| 3 | CHEMBL2035187 |
| 3 | CHEMBL2151572 |
| 3 | CHEMBL2220486 |
| 3 | CHEMBL2325741 |
| 3 | CHEMBL2336325 |
| 3 | CHEMBL2387408 |
| 3 | CHEMBL3128043 |
| 3 | CHEMBL3137332 |
| 3 | CHEMBL3219124 |
| 3 | CHEMBL3260567 |
| 3 | CHEMBL3301620 |
| 3 | CHEMBL3545027 |
| 3 | CHEMBL3647536 |
| 3 | CHEMBL3707218 |
| 3 | CHEMBL3780740 |
| 3 | CHEMBL3787344 |
| 3 | CHEMBL3916243 |
| 3 | CHEMBL3979920 |
| 3 | CHEMBL3986824 |
| 3 | CHEMBL3989834 |
| 3 | CHEMBL4068611 |
| 3 | CHEMBL4081711 |
| 3 | CHEMBL4084907 |
| 3 | CHEMBL4163691 |
| 3 | CHEMBL4208229 |
| 3 | CHEMBL4212531 |
| 3 | CHEMBL4249337 |
| 3 | CHEMBL4297184 |
| 3 | CHEMBL4442620 |
| 4 | CHEMBL6318 |
| 4 | CHEMBL44 |
| 4 | CHEMBL9509 |
| 4 | CHEMBL12089 |
| 4 | CHEMBL11662 |
| 4 | CHEMBL14249 |
| 4 | CHEMBL19299 |
| 4 | CHEMBL279014 |
| 4 | CHEMBL23261 |
| 4 | CHEMBL279229 |
| 4 | CHEMBL281872 |
| 4 | CHEMBL145 |
| 4 | CHEMBL837 |
| 4 | CHEMBL43068 |
| 4 | CHEMBL51483 |
| 4 | CHEMBL299155 |
| 4 | CHEMBL300138 |
| 4 | CHEMBL294029 |
| 4 | CHEMBL74415 |
| 4 | CHEMBL310671 |
| 4 | CHEMBL88712 |
| 4 | CHEMBL119385 |
| 4 | CHEMBL129482 |
| 4 | CHEMBL424133 |
| 4 | CHEMBL346631 |
| 4 | CHEMBL152067 |
| 4 | CHEMBL350775 |
| 4 | CHEMBL353581 |
| 4 | CHEMBL171679 |
| 4 | CHEMBL184238 |
| 4 | CHEMBL197194 |
| 4 | CHEMBL363648 |
| 4 | CHEMBL377300 |
| 4 | CHEMBL209821 |
| 4 | CHEMBL220360 |
| 4 | CHEMBL426559 |
| 4 | CHEMBL225157 |
| 4 | CHEMBL399910 |
| 4 | CHEMBL405130 |
| 4 | CHEMBL460026 |
| 4 | CHEMBL521589 |
| 4 | CHEMBL468154 |
| 4 | CHEMBL445813 |
| 4 | CHEMBL456237 |
| 4 | CHEMBL483158 |
| 4 | CHEMBL545315 |
| 4 | CHEMBL541388 |
| 4 | CHEMBL562668 |
| 4 | CHEMBL583912 |
| 4 | CHEMBL577294 |
| 4 | CHEMBL578390 |
| 4 | CHEMBL599552 |
| 4 | CHEMBL607023 |
| 4 | CHEMBL1088751 |
| 4 | CHEMBL1090173 |
| 4 | CHEMBL1230607 |
| 4 | CHEMBL1233584 |
| 4 | CHEMBL1256723 |
| 4 | CHEMBL1258006 |
| 4 | CHEMBL1475252 |
| 4 | CHEMBL1512580 |
| 4 | CHEMBL1531134 |
| 4 | CHEMBL1649931 |
| 4 | CHEMBL1651956 |
| 4 | CHEMBL1672635 |
| 4 | CHEMBL1705373 |
| 4 | CHEMBL1801250 |
| 4 | CHEMBL1829174 |
| 4 | CHEMBL1951032 |
| 4 | CHEMBL1951914 |
| 4 | CHEMBL2018096 |
| 4 | CHEMBL2059028 |
| 4 | CHEMBL2103881 |
| 4 | CHEMBL2105671 |
| 4 | CHEMBL2107383 |
| 4 | CHEMBL2153191 |
| 4 | CHEMBL2178579 |
| 4 | CHEMBL2323775 |
| 4 | CHEMBL2387541 |
| 4 | CHEMBL2387742 |
| 4 | CHEMBL2393130 |
| 4 | CHEMBL3137336 |
| 4 | CHEMBL3259907 |
| 4 | CHEMBL3265032 |
| 4 | CHEMBL3286797 |
| 4 | CHEMBL3355009 |
| 4 | CHEMBL3421729 |
| 4 | CHEMBL3544913 |
| 4 | CHEMBL3544964 |
| 4 | CHEMBL3544983 |
| 4 | CHEMBL3545097 |
| 4 | CHEMBL3545241 |
| 4 | CHEMBL3545307 |
| 4 | CHEMBL3622533 |
| 4 | CHEMBL3655081 |
| 4 | CHEMBL3663929 |
| 4 | CHEMBL3693786 |
| 4 | CHEMBL3786098 |
| 4 | CHEMBL3786182 |
| 4 | CHEMBL3786896 |
| 4 | CHEMBL3793226 |
| 4 | CHEMBL3806158 |
| 4 | CHEMBL3939295 |
| 4 | CHEMBL4072756 |
| 4 | CHEMBL4086143 |
| 4 | CHEMBL4091762 |
| 4 | CHEMBL4227736 |
| 4 | CHEMBL4297317 |
| 4 | CHEMBL4297644 |
| 4 | CHEMBL4297674 |
| 4 | CHEMBL4456123 |
| 4 | CHEMBL4649457 |
| 5 | CHEMBL266497 |
| 5 | CHEMBL8809 |
| 5 | CHEMBL63 |
| 5 | CHEMBL273264 |
| 5 | CHEMBL12543 |
| 5 | CHEMBL273481 |
| 5 | CHEMBL428690 |
| 5 | CHEMBL576 |
| 5 | CHEMBL17962 |
| 5 | CHEMBL21333 |
| 5 | CHEMBL279433 |
| 5 | CHEMBL23393 |
| 5 | CHEMBL27759 |
| 5 | CHEMBL288149 |
| 5 | CHEMBL288114 |
| 5 | CHEMBL42442 |
| 5 | CHEMBL295124 |
| 5 | CHEMBL46730 |
| 5 | CHEMBL297792 |
| 5 | CHEMBL49120 |
| 5 | CHEMBL48361 |
| 5 | CHEMBL51149 |
| 5 | CHEMBL291962 |
| 5 | CHEMBL60889 |
| 5 | CHEMBL75094 |
| 5 | CHEMBL77921 |
| 5 | CHEMBL85164 |
| 5 | CHEMBL1067 |
| 5 | CHEMBL91829 |
| 5 | CHEMBL88153 |
| 5 | CHEMBL95431 |
| 5 | CHEMBL100259 |
| 5 | CHEMBL103667 |
| 5 | CHEMBL107430 |
| 5 | CHEMBL116438 |
| 5 | CHEMBL119625 |
| 5 | CHEMBL123558 |
| 5 | CHEMBL129857 |
| 5 | CHEMBL142652 |
| 5 | CHEMBL358850 |
| 5 | CHEMBL1267 |
| 5 | CHEMBL146624 |
| 5 | CHEMBL180570 |
| 5 | CHEMBL367149 |
| 5 | CHEMBL181954 |
| 5 | CHEMBL450940 |
| 5 | CHEMBL190083 |
| 5 | CHEMBL435298 |
| 5 | CHEMBL195560 |
| 5 | CHEMBL376408 |
| 5 | CHEMBL226345 |
| 5 | CHEMBL231616 |
| 5 | CHEMBL232202 |
| 5 | CHEMBL239800 |
| 5 | CHEMBL397647 |
| 5 | CHEMBL252164 |
| 5 | CHEMBL255231 |
| 5 | CHEMBL256147 |
| 5 | CHEMBL412262 |
| 5 | CHEMBL406381 |
| 5 | CHEMBL258805 |
| 5 | CHEMBL258940 |
| 5 | CHEMBL271475 |
| 5 | CHEMBL272980 |
| 5 | CHEMBL405821 |
| 5 | CHEMBL511099 |
| 5 | CHEMBL488436 |
| 5 | CHEMBL507361 |
| 5 | CHEMBL489095 |
| 5 | CHEMBL494480 |
| 5 | CHEMBL473841 |
| 5 | CHEMBL496634 |
| 5 | CHEMBL465183 |
| 5 | CHEMBL464792 |
| 5 | CHEMBL482968 |
| 5 | CHEMBL519504 |
| 5 | CHEMBL551813 |
| 5 | CHEMBL575448 |
| 5 | CHEMBL587723 |
| 5 | CHEMBL589390 |
| 5 | CHEMBL592374 |
| 5 | CHEMBL1076211 |
| 5 | CHEMBL1086997 |
| 5 | CHEMBL1171754 |
| 5 | CHEMBL1173532 |
| 5 | CHEMBL1172928 |
| 5 | CHEMBL1213492 |
| 5 | CHEMBL1230982 |
| 5 | CHEMBL1269258 |
| 5 | CHEMBL1276127 |
| 5 | CHEMBL1614713 |
| 5 | CHEMBL1651534 |
| 5 | CHEMBL1672054 |
| 5 | CHEMBL1716983 |
| 5 | CHEMBL1738699 |
| 5 | CHEMBL1818341 |
| 5 | CHEMBL1818442 |
| 5 | CHEMBL1851943 |
| 5 | CHEMBL1923234 |
| 5 | CHEMBL1950289 |
| 5 | CHEMBL1980297 |
| 5 | CHEMBL1980391 |
| 5 | CHEMBL2001019 |
| 5 | CHEMBL2028665 |
| 5 | CHEMBL2058833 |
| 5 | CHEMBL2103851 |
| 5 | CHEMBL2103863 |
| 5 | CHEMBL2103879 |
| 5 | CHEMBL2105763 |
| 5 | CHEMBL2110731 |
| 5 | CHEMBL2111110 |
| 5 | CHEMBL2165191 |
| 5 | CHEMBL2177913 |
| 5 | CHEMBL2325429 |
| 5 | CHEMBL2338329 |
| 5 | CHEMBL2364628 |
| 5 | CHEMBL2386081 |
| 5 | CHEMBL2387080 |
| 5 | CHEMBL3039513 |
| 5 | CHEMBL3039531 |
| 5 | CHEMBL3092995 |
| 5 | CHEMBL3261331 |
| 5 | CHEMBL3360203 |
| 5 | CHEMBL3597952 |
| 5 | CHEMBL3601411 |
| 5 | CHEMBL3646221 |
| 5 | CHEMBL3661115 |
| 5 | CHEMBL3679680 |
| 5 | CHEMBL3707392 |
| 5 | CHEMBL3900554 |
| 5 | CHEMBL4072833 |
| 5 | CHEMBL4283683 |
| 5 | CHEMBL4290141 |
| 5 | CHEMBL4297299 |
| 5 | CHEMBL4297463 |
| 5 | CHEMBL4297520 |
| 5 | CHEMBL4303323 |
| 6 | CHEMBL39 |
| 6 | CHEMBL267777 |
| 6 | CHEMBL99 |
| 6 | CHEMBL441765 |
| 6 | CHEMBL14762 |
| 6 | CHEMBL19449 |
| 6 | CHEMBL627 |
| 6 | CHEMBL440464 |
| 6 | CHEMBL286494 |
| 6 | CHEMBL286738 |
| 6 | CHEMBL151 |
| 6 | CHEMBL290352 |
| 6 | CHEMBL43185 |
| 6 | CHEMBL41194 |
| 6 | CHEMBL41632 |
| 6 | CHEMBL295316 |
| 6 | CHEMBL291278 |
| 6 | CHEMBL44752 |
| 6 | CHEMBL298817 |
| 6 | CHEMBL56337 |
| 6 | CHEMBL64130 |
| 6 | CHEMBL165 |
| 6 | CHEMBL308148 |
| 6 | CHEMBL77305 |
| 6 | CHEMBL87563 |
| 6 | CHEMBL319144 |
| 6 | CHEMBL107367 |
| 6 | CHEMBL110094 |
| 6 | CHEMBL114551 |
| 6 | CHEMBL435381 |
| 6 | CHEMBL116943 |
| 6 | CHEMBL127592 |
| 6 | CHEMBL435191 |
| 6 | CHEMBL142635 |
| 6 | CHEMBL356388 |
| 6 | CHEMBL164660 |
| 6 | CHEMBL172513 |
| 6 | CHEMBL364804 |
| 6 | CHEMBL186179 |
| 6 | CHEMBL216981 |
| 6 | CHEMBL222460 |
| 6 | CHEMBL223360 |
| 6 | CHEMBL389433 |
| 6 | CHEMBL228814 |
| 6 | CHEMBL242341 |
| 6 | CHEMBL410414 |
| 6 | CHEMBL235191 |
| 6 | CHEMBL259223 |
| 6 | CHEMBL270271 |
| 6 | CHEMBL407874 |
| 6 | CHEMBL488025 |
| 6 | CHEMBL452861 |
| 6 | CHEMBL483465 |
| 6 | CHEMBL490029 |
| 6 | CHEMBL498485 |
| 6 | CHEMBL482950 |
| 6 | CHEMBL559478 |
| 6 | CHEMBL561132 |
| 6 | CHEMBL563251 |
| 6 | CHEMBL574737 |
| 6 | CHEMBL585902 |
| 6 | CHEMBL571209 |
| 6 | CHEMBL565612 |
| 6 | CHEMBL604710 |
| 6 | CHEMBL1090089 |
| 6 | CHEMBL1093458 |
| 6 | CHEMBL1160571 |
| 6 | CHEMBL1258517 |
| 6 | CHEMBL1407943 |
| 6 | CHEMBL1614766 |
| 6 | CHEMBL1767164 |
| 6 | CHEMBL1790006 |
| 6 | CHEMBL1800807 |
| 6 | CHEMBL1801204 |
| 6 | CHEMBL1808388 |
| 6 | CHEMBL1829335 |
| 6 | CHEMBL1879463 |
| 6 | CHEMBL1902981 |
| 6 | CHEMBL2019090 |
| 6 | CHEMBL2036958 |
| 6 | CHEMBL2041980 |
| 6 | CHEMBL2103828 |
| 6 | CHEMBL2105617 |
| 6 | CHEMBL2107771 |
| 6 | CHEMBL2331680 |
| 6 | CHEMBL3113165 |
| 6 | CHEMBL3301625 |
| 6 | CHEMBL3301626 |
| 6 | CHEMBL3311228 |
| 6 | CHEMBL3338194 |
| 6 | CHEMBL3338866 |
| 6 | CHEMBL3348861 |
| 6 | CHEMBL3581647 |
| 6 | CHEMBL3608680 |
| 6 | CHEMBL3695568 |
| 6 | CHEMBL3747513 |
| 6 | CHEMBL3786343 |
| 6 | CHEMBL3907479 |
| 6 | CHEMBL3928407 |
| 6 | CHEMBL3935857 |
| 6 | CHEMBL4080228 |
| 6 | CHEMBL4225966 |
| 6 | CHEMBL4296717 |
| 6 | CHEMBL4297454 |
| 6 | CHEMBL4297594 |
| 6 | CHEMBL4650360 |
| 7 | CHEMBL6246 |
| 7 | CHEMBL7890 |
| 7 | CHEMBL8145 |
| 7 | CHEMBL7983 |
| 7 | CHEMBL267476 |
| 7 | CHEMBL9194 |
| 7 | CHEMBL489 |
| 7 | CHEMBL10188 |
| 7 | CHEMBL12208 |
| 7 | CHEMBL276711 |
| 7 | CHEMBL15192 |
| 7 | CHEMBL574 |
| 7 | CHEMBL16503 |
| 7 | CHEMBL428676 |
| 7 | CHEMBL20684 |
| 7 | CHEMBL23832 |
| 7 | CHEMBL26424 |
| 7 | CHEMBL289228 |
| 7 | CHEMBL297453 |
| 7 | CHEMBL51085 |
| 7 | CHEMBL48802 |
| 7 | CHEMBL440115 |
| 7 | CHEMBL301523 |
| 7 | CHEMBL954 |
| 7 | CHEMBL292687 |
| 7 | CHEMBL84158 |
| 7 | CHEMBL83527 |
| 7 | CHEMBL415324 |
| 7 | CHEMBL114283 |
| 7 | CHEMBL153479 |
| 7 | CHEMBL368347 |
| 7 | CHEMBL427526 |
| 7 | CHEMBL191482 |
| 7 | CHEMBL363387 |
| 7 | CHEMBL382277 |
| 7 | CHEMBL371064 |
| 7 | CHEMBL217899 |
| 7 | CHEMBL225304 |
| 7 | CHEMBL245019 |
| 7 | CHEMBL246600 |
| 7 | CHEMBL399510 |
| 7 | CHEMBL253896 |
| 7 | CHEMBL262344 |
| 7 | CHEMBL402548 |
| 7 | CHEMBL487182 |
| 7 | CHEMBL540445 |
| 7 | CHEMBL471036 |
| 7 | CHEMBL560993 |
| 7 | CHEMBL566757 |
| 7 | CHEMBL590799 |
| 7 | CHEMBL1091644 |
| 7 | CHEMBL1096927 |
| 7 | CHEMBL1082723 |
| 7 | CHEMBL1233524 |
| 7 | CHEMBL1236282 |
| 7 | CHEMBL1236924 |
| 7 | CHEMBL1643880 |
| 7 | CHEMBL1672002 |
| 7 | CHEMBL1733174 |
| 7 | CHEMBL1905073 |
| 7 | CHEMBL2029988 |
| 7 | CHEMBL2152712 |
| 7 | CHEMBL2178573 |
| 7 | CHEMBL3298910 |
| 7 | CHEMBL3301604 |
| 7 | CHEMBL3408947 |
| 7 | CHEMBL3545366 |
| 7 | CHEMBL3545369 |
| 7 | CHEMBL3621988 |
| 7 | CHEMBL3633460 |
| 7 | CHEMBL3678076 |
| 7 | CHEMBL3987016 |
| 7 | CHEMBL4093031 |
| 7 | CHEMBL4297865 |
| 7 | CHEMBL4650304 |
| 7 | CHEMBL4650334 |
| 8 | CHEMBL6731 |
| 8 | CHEMBL8260 |
| 8 | CHEMBL50 |
| 8 | CHEMBL11608 |
| 8 | CHEMBL13766 |
| 8 | CHEMBL566 |
| 8 | CHEMBL9113 |
| 8 | CHEMBL275638 |
| 8 | CHEMBL17350 |
| 8 | CHEMBL31574 |
| 8 | CHEMBL286013 |
| 8 | CHEMBL39677 |
| 8 | CHEMBL43048 |
| 8 | CHEMBL76688 |
| 8 | CHEMBL440498 |
| 8 | CHEMBL332750 |
| 8 | CHEMBL263198 |
| 8 | CHEMBL147806 |
| 8 | CHEMBL190044 |
| 8 | CHEMBL225411 |
| 8 | CHEMBL230011 |
| 8 | CHEMBL475251 |
| 8 | CHEMBL561339 |
| 8 | CHEMBL1096380 |
| 8 | CHEMBL1672973 |
| 8 | CHEMBL2165326 |
| 8 | CHEMBL2348292 |
| 8 | CHEMBL2364618 |
| 8 | CHEMBL3039529 |
| 8 | CHEMBL3126842 |
| 8 | CHEMBL3545157 |
| 8 | CHEMBL3696475 |
| 8 | CHEMBL3989870 |
| 8 | CHEMBL4085457 |
| 8 | CHEMBL4514636 |
| 8 | CHEMBL4541964 |
| 8 | CHEMBL4592045 |
| 8 | CHEMBL4594446 |
| 9 | CHEMBL478 |
| 9 | CHEMBL16293 |
| 9 | CHEMBL17289 |
| 9 | CHEMBL32479 |
| 9 | CHEMBL101253 |
| 9 | CHEMBL180101 |
| 9 | CHEMBL255044 |
| 9 | CHEMBL482811 |
| 9 | CHEMBL551978 |
| 9 | CHEMBL1230122 |
| 9 | CHEMBL1232461 |
| 9 | CHEMBL1672627 |
| 9 | CHEMBL1773683 |
| 9 | CHEMBL1822792 |
| 9 | CHEMBL1933349 |
| 9 | CHEMBL2181776 |
| 9 | CHEMBL2442750 |
| 9 | CHEMBL3544960 |
| 9 | CHEMBL3581693 |
| 9 | CHEMBL4297224 |
| 9 | CHEMBL4301600 |
| 10 | CHEMBL266510 |
| 10 | CHEMBL267044 |
| 10 | CHEMBL375492 |
| 10 | CHEMBL1914489 |
| 10 | CHEMBL2104970 |
